# Supplementary material for: Evaluation and driving factors of ecological environment quality in the Tarim River basin based on remote sensing ecological index
Source: PeerJ journal article supplement (doi:10.7717/peerj.18368), 2024-10-28
Supplement: Correlation_analysis_data.xls [file Correlation_analysis_data.xls]

## Sheet: data
WET	RSEI	NDVI	NDBSI	LST
0.27033	0.292031	0.256728	0.598662	0.659994
0.276202	0.263855	0.235008	0.589447	0.685488
0.315493	0.289989	0.243886	0.582668	0.666134
0.331454	0.383419	0.213267	0.567837	0.5144
0.23463	0.288789	0.24362	0.598717	0.628956
0.286467	0.31212	0.244394	0.588471	0.614491
0.316037	0.368984	0.108577	0.583941	0.486924
0.340449	0.303046	0.251867	0.561997	0.653183
0.486205	0.44408	0.110454	0.126777	0.236406
0.390016	0.314074	0.215128	0.567954	0.655842
0.24438	0.301293	0.243047	0.584457	0.626745
0.25909	0.292758	0.238159	0.590114	0.630223
0.284962	0.35021	0.228356	0.582796	0.577531
0.277463	0.312101	0.220548	0.588335	0.608454
0.277063	0.325497	0.239491	0.594401	0.590602
0.222978	0.27022	0.233154	0.594695	0.657241
0.201713	0.279277	0.223043	0.589916	0.628513
0.256908	0.303139	0.252904	0.587137	0.619851
0.206027	0.301577	0.234727	0.59512	0.586947
0.205601	0.302604	0.257741	0.608825	0.60092
0.216363	0.287118	0.239978	0.586849	0.636979
0.388977	0.382767	0.21902	0.559424	0.552631
0.465709	0.410452	0.146366	0.4397	0.536406
0.275159	0.274676	0.231874	0.592292	0.652526
0.29066	0.29922	0.2377	0.588728	0.651726
0.272032	0.313281	0.233139	0.588208	0.609962
0.242542	0.302113	0.227639	0.591066	0.618072
0.240775	0.319998	0.23755	0.597247	0.589649
0.199155	0.2952	0.236568	0.595194	0.609267
0.232306	0.285733	0.244861	0.583501	0.629093
0.187732	0.297084	0.248112	0.593281	0.614434
0.201479	0.268912	0.240659	0.586676	0.654145
0.215245	0.23581	0.238172	0.586636	0.700288
0.254006	0.277093	0.278275	0.582198	0.674322
0.391069	0.528919	0.179569	0.535137	0.504021
0.22233	0.261902	0.224682	0.568789	0.671969
0.219754	0.239755	0.22283	0.566796	0.685393
0.381301	0.353205	0.212182	0.551404	0.597391
0.244441	0.252904	0.242464	0.590222	0.699384
0.342107	0.285741	0.209744	0.568981	0.666467
0.170814	0.267265	0.232607	0.586843	0.66634
0.368617	0.309252	0.221499	0.515139	0.635707
0.233237	0.283031	0.252096	0.576017	0.650801
0.197992	0.293579	0.257808	0.59081	0.610542
0.205611	0.295542	0.239631	0.587942	0.614119
0.22106	0.300588	0.250226	0.588887	0.612077
0.18704	0.267198	0.265741	0.592192	0.644943
0.151846	0.250442	0.219863	0.576651	0.652915
0.186812	0.254599	0.237174	0.582268	0.655446
0.186818	0.232588	0.238224	0.588832	0.693303
0.200294	0.235089	0.225031	0.58252	0.689243
0.2256	0.19354	0.226854	0.585738	0.747916
0.253077	0.21819	0.226684	0.576741	0.736903
0.300324	0.29312	0.223581	0.574692	0.657077
0.209127	0.371399	0.243927	0.594856	0.523242
0.465139	0.542279	0.145614	0.420977	0.353935
0.336332	0.420577	0.24845	0.531909	0.566779
0.258303	0.319609	0.21748	0.576573	0.628838
0.244666	0.284381	0.234031	0.591958	0.628167
0.220263	0.280577	0.245112	0.5871	0.655235
0.198759	0.265403	0.25698	0.588736	0.6662
0.158361	0.272036	0.250796	0.583864	0.63653
0.199181	0.24701	0.240043	0.576052	0.680054
0.197333	0.248126	0.219777	0.575388	0.669918
0.196713	0.249515	0.220273	0.570829	0.680208
0.204168	0.238513	0.21039	0.566161	0.686141
0.249914	0.264209	0.230668	0.578399	0.682073
0.327735	0.320862	0.213807	0.566537	0.624529
0.269559	0.288921	0.237094	0.575726	0.65554
0.298035	0.322601	0.214576	0.571764	0.617394
0.2056	0.504531	0.203395	0.542876	0.301034
0.379144	0.521333	0.22973	0.466276	0.356369
0.37495	0.565092	0.170431	0.482348	0.350467
0.243686	0.357848	0.256146	0.561868	0.556874
0.244471	0.299327	0.243966	0.58236	0.618999
0.165355	0.287024	0.237293	0.58963	0.617456
0.162718	0.304345	0.253854	0.596352	0.571128
0.112142	0.310448	0.261752	0.589099	0.567959
0.142584	0.294125	0.269989	0.591053	0.612251
0.245933	0.30134	0.24493	0.579714	0.643448
0.171217	0.251942	0.243586	0.585626	0.668701
0.189198	0.241424	0.225034	0.570538	0.682839
0.266257	0.291995	0.217252	0.574763	0.643699
0.201225	0.249693	0.246938	0.577491	0.690804
0.204849	0.228439	0.245919	0.579268	0.712403
0.277942	0.246454	0.236219	0.564012	0.718409
0.190233	0.256503	0.265648	0.570089	0.687713
0.210096	0.195546	0.253311	0.573488	0.753063
0.131947	0.338683	0.254983	0.582455	0.564953
0.127972	0.320977	0.260223	0.579708	0.560298
0.140979	0.293322	0.252188	0.589432	0.604704
0.275208	0.336639	0.246405	0.577578	0.587193
0.200842	0.288784	0.249758	0.597869	0.618365
0.238528	0.328909	0.252217	0.597278	0.585885
0.207242	0.295955	0.244536	0.586793	0.613644
0.331342	0.318833	0.207161	0.558138	0.624286
0.233832	0.365587	0.256275	0.562925	0.538397
0.173199	0.29353	0.251445	0.586723	0.601729
0.192081	0.264853	0.246282	0.579525	0.653215
0.221228	0.268525	0.234981	0.581325	0.658684
0.206349	0.246731	0.234782	0.578374	0.683479
0.154591	0.288328	0.26284	0.580406	0.608689
0.143935	0.230503	0.250951	0.576789	0.690624
0.204121	0.190279	0.239877	0.586763	0.758959
0.247478	0.196895	0.229615	0.571054	0.773322
0.201167	0.202829	0.239314	0.574573	0.758726
0.199175	0.420582	0.257155	0.569005	0.471774
0.757186	0.710808	0.114676	0.255736	0.272736
0.162016	0.390627	0.228825	0.5879	0.489812
0.189538	0.297658	0.228221	0.593634	0.587206
0.223072	0.368071	0.249705	0.596794	0.536322
0.329465	0.294887	0.233278	0.579875	0.670693
0.276165	0.264895	0.244666	0.582665	0.692545
0.347624	0.35603	0.228792	0.567324	0.604455
0.31066	0.36474	0.242281	0.57669	0.550393
0.220601	0.319421	0.249871	0.587835	0.608619
0.208926	0.260496	0.246665	0.594001	0.670418
0.152946	0.297701	0.267538	0.576676	0.59517
0.153326	0.314796	0.258904	0.576822	0.588443
0.208894	0.266139	0.261531	0.5754	0.682955
0.215245	0.235216	0.242318	0.582139	0.707094
0.204943	0.248424	0.261562	0.578873	0.691894
0.292744	0.291739	0.246281	0.568391	0.654402
0.267373	0.276788	0.244878	0.554374	0.660337
0.231791	0.240381	0.22602	0.573932	0.696701
0.299179	0.283468	0.199769	0.556473	0.688572
0.305518	0.2343	0.241522	0.553884	0.765038
0.0852852	0.297871	0.251764	0.586577	0.55771
0.102694	0.341067	0.250983	0.586142	0.51473
0.461759	0.512676	0.224341	0.429926	0.359652
0.218487	0.313972	0.241101	0.59016	0.59927
0.356718	0.323121	0.211431	0.56054	0.626388
0.685101	0.645374	0.123463	0.268321	0.382974
0.32506	0.312977	0.231473	0.584015	0.643086
0.269067	0.330974	0.28404	0.593112	0.609636
0.315253	0.275132	0.257133	0.570885	0.685853
0.201167	0.297375	0.24947	0.592401	0.616889
0.170919	0.27924	0.261262	0.586621	0.612367
0.176312	0.254555	0.260531	0.577882	0.661885
0.153998	0.265953	0.269597	0.589405	0.639824
0.145334	0.22015	0.24243	0.578111	0.699721
0.13505	0.198814	0.239431	0.580842	0.723775
0.190978	0.20014	0.241242	0.579721	0.740279
0.184648	0.260155	0.17781	0.580423	0.616333
0.388091	0.452878	0.106399	0.533927	0.206913
0.255108	0.206249	0.220096	0.554964	0.755383
0.213106	0.204759	0.22367	0.56003	0.734249
0.316041	0.242427	0.22029	0.563686	0.74107
0.269698	0.159417	0.103813	0.558363	0.213216
0.199045	0.299616	0.21251	0.574752	0.507371
0.172664	0.302902	0.248893	0.57985	0.599215
0.1834	0.325843	0.247986	0.580774	0.567136
0.161545	0.285481	0.241738	0.587722	0.618106
0.36184	0.334233	0.224126	0.564854	0.616987
0.26882	0.359211	0.244237	0.585894	0.559372
0.31364	0.301378	0.233112	0.570552	0.660698
0.312844	0.329768	0.279849	0.595562	0.61556
0.36401	0.31223	0.252934	0.563872	0.678261
0.274421	0.273528	0.242225	0.576282	0.678497
0.181244	0.2872	0.255401	0.573352	0.631897
0.159098	0.28949	0.264126	0.580777	0.631865
0.210364	0.248461	0.25935	0.574694	0.700224
0.150852	0.258733	0.256194	0.576075	0.666595
0.108802	0.218086	0.236926	0.576253	0.692448
0.196126	0.209222	0.220891	0.577634	0.723577
0.146496	0.158533	0.218934	0.5768	0.790689
0.18522	0.175141	0.239492	0.576959	0.791335
0.252261	0.169353	0.23389	0.580627	0.809722
0.232729	0.194691	0.221526	0.561656	0.762412
0.330669	0.244108	0.211538	0.533442	0.72568
0.322641	0.247202	0.225391	0.549397	0.732911
0.314221	0.295921	0.223502	0.551072	0.654955
0.712368	0.764458	0.12235	0.283335	0.209976
0.356952	0.478237	0.186816	0.551285	0.43149
0.299027	0.308282	0.206547	0.575433	0.629437
0.552679	0.533144	0.137122	0.344927	0.49162
0.503025	0.59613	0.157738	0.378505	0.38403
0.178535	0.292869	0.242275	0.589351	0.611733
0.213331	0.304527	0.214783	0.584852	0.590599
0.191291	0.31581	0.239137	0.582819	0.571264
0.149722	0.294646	0.246614	0.585258	0.602567
0.184025	0.305785	0.233151	0.603573	0.578328
0.286789	0.322384	0.228443	0.567579	0.601083
0.209258	0.307524	0.259596	0.57069	0.625294
0.302022	0.253098	0.228255	0.577142	0.70926
0.264331	0.296382	0.234953	0.5756	0.639784
0.292781	0.278102	0.259481	0.566668	0.68883
0.172651	0.203972	0.22789	0.572107	0.733088
0.212282	0.203394	0.231888	0.571711	0.74174
0.18309	0.201077	0.216955	0.573382	0.743977
0.145388	0.191601	0.236164	0.577943	0.734729
0.140123	0.195503	0.219019	0.560067	0.731026
0.182717	0.187882	0.236318	0.576732	0.75897
0.163281	0.214494	0.218172	0.572089	0.707905
0.183463	0.184375	0.224785	0.582453	0.754542
0.251501	0.194927	0.222879	0.584044	0.76535
0.231257	0.299852	0.247221	0.596486	0.620541
0.33719	0.295404	0.24011	0.547666	0.678865
0.34133	0.296433	0.239324	0.555315	0.676744
0.285038	0.318991	0.228928	0.563837	0.52811
0.793166	0.688675	0.0680687	0.241396	0.184108
0.715401	0.742883	0.118812	0.284391	0.203798
0.619261	0.677908	0.114816	0.295395	0.274465
0.841133	0.804232	0.133481	0.234731	0.194052
0.829136	0.769981	0.134691	0.24751	0.224646
0.720718	0.752138	0.132509	0.272344	0.210595
0.6114	0.690542	0.157933	0.336629	0.254325
0.770993	0.750404	0.130149	0.2481	0.239057
0.420624	0.572274	0.165675	0.452319	0.303066
0.81039	0.762552	0.122139	0.25315	0.237115
0.212543	0.326174	0.253926	0.571177	0.58227
0.206367	0.299539	0.270043	0.575459	0.61954
0.261161	0.298724	0.247794	0.578665	0.634336
0.473152	0.412214	0.204281	0.425618	0.559649
0.0212031	0.194145	0.134894	0.0632919	0.579623
0.022764	0.177234	0.131241	0.0631471	0.620099
0.203267	0.244567	0.225907	0.57094	0.696066
0.215565	0.264058	0.222603	0.568602	0.661385
0.235713	0.241829	0.222446	0.571319	0.701938
0.296428	0.27488	0.214801	0.549258	0.690608
0.319662	0.261617	0.216548	0.542487	0.698233
0.839395	0.780143	0.127622	0.209865	0.226461
0.431506	0.519782	0.131485	0.457012	0.340828
0.389053	0.476326	0.105458	0.498861	0.373418
0.199877	0.481584	0.232309	0.555744	0.366202
0.284945	0.35034	0.234975	0.571463	0.563069
0.147732	0.303711	0.248093	0.584115	0.575537
0.13362	0.261448	0.239927	0.588693	0.635754
0.285871	0.33075	0.21627	0.570941	0.561625
0.245087	0.377243	0.246416	0.57127	0.514633
0.369202	0.317068	0.240717	0.566862	0.623672
0.29541	0.168971	0.220854	0.583011	0.817838
0.341144	0.337423	0.237422	0.572732	0.668154
0.33012	0.201079	0.186308	0.551887	0.714186
0.250273	0.174549	0.220835	0.586537	0.796085
0.315854	0.270314	0.220302	0.565326	0.710332
0.299383	0.267711	0.224854	0.566518	0.683088
0.275946	0.247302	0.207837	0.562284	0.725286
0.223099	0.24566	0.22542	0.574771	0.677098
0.302159	0.294769	0.206	0.543467	0.657845
0.188188	0.212452	0.239605	0.591582	0.734764
0.22969	0.20943	0.22612	0.586889	0.730724
0.319544	0.255427	0.223728	0.572586	0.691334
0.240325	0.27796	0.228262	0.577952	0.656196
0.25771	0.302704	0.239301	0.570692	0.636996
0.217342	0.288171	0.220443	0.559187	0.639833
0.266315	0.318473	0.232694	0.58706	0.639289
0.677981	0.691976	0.117179	0.304829	0.232533
0.71355	0.741761	0.129177	0.28362	0.219018
0.809544	0.774527	0.122944	0.243561	0.187647
0.775988	0.747474	0.123448	0.254539	0.216036
0.365153	0.522995	0.202097	0.506121	0.307261
0.487784	0.635083	0.146418	0.4018	0.258818
0.530581	0.62311	0.146415	0.33813	0.287975
0.775606	0.742357	0.123832	0.244699	0.247293
0.505178	0.612501	0.145095	0.372329	0.29033
0.351553	0.50942	0.201507	0.541801	0.346913
0.322976	0.528835	0.189586	0.534873	0.292531
0.215571	0.325777	0.289553	0.565253	0.607643
0.843815	0.783391	0.142279	0.242268	0.210958
0.794572	0.760389	0.151033	0.233933	0.245105
0.223546	0.258244	0.277997	0.558431	0.691807
0.240424	0.274485	0.243061	0.58412	0.65002
0.338642	0.333293	0.225541	0.544826	0.608165
0.668887	0.655317	0.142091	0.278301	0.312621
0.273857	0.245254	0.227041	0.575826	0.686538
0.245776	0.236636	0.24064	0.57883	0.72112
0.206698	0.260747	0.224047	0.579717	0.659449
0.172473	0.270145	0.246744	0.579576	0.654619
0.18616	0.21455	0.229173	0.571122	0.699731
0.156798	0.2286	0.221638	0.577724	0.665926
0.155612	0.209178	0.223251	0.581409	0.700167
0.206869	0.310049	0.221051	0.578277	0.600221
0.17593	0.254456	0.232061	0.577625	0.668536
0.245875	0.239712	0.218436	0.567198	0.694043
0.621288	0.68961	0.111859	0.337016	0.161041
0.546648	0.598056	0.118538	0.313966	0.33543
0.488957	0.566212	0.125191	0.408112	0.339523
0.270327	0.40332	0.200929	0.549052	0.396214
0.282429	0.365034	0.240852	0.589715	0.602157
0.221435	0.356935	0.248434	0.580411	0.487846
0.271889	0.40866	0.167849	0.549041	0.443686
0.283057	0.384798	0.22874	0.588792	0.565991
0.462607	0.433639	0.166615	0.445394	0.459407
0.295159	0.528086	0.187958	0.537555	0.334027
0.174303	0.313984	0.232386	0.574304	0.563876
0.197573	0.328071	0.248835	0.578041	0.585408
0.137106	0.311387	0.252223	0.58643	0.621704
0.257407	0.337216	0.230982	0.576502	0.53106
0.322448	0.30447	0.226304	0.554137	0.637843
0.306418	0.246086	0.222581	0.561718	0.79725
0.339734	0.283391	0.234024	0.549817	0.723225
0.369079	0.462307	0.237129	0.535231	0.57462
0.269403	0.228204	0.230568	0.563912	0.742966
0.320049	0.269839	0.238015	0.574226	0.668385
0.311971	0.272752	0.224788	0.57745	0.708687
0.225453	0.20273	0.202496	0.579735	0.72789
0.2396	0.252632	0.208013	0.564575	0.688081
0.223367	0.204191	0.217982	0.572747	0.749409
0.18831	0.183359	0.231541	0.592263	0.768963
0.22127	0.205231	0.233382	0.598377	0.758652
0.296796	0.339904	0.23282	0.563469	0.615791
0.649764	0.574138	0.146285	0.311191	0.417305
0.74911	0.689153	0.125891	0.258033	0.307536
0.626664	0.64374	0.142507	0.325277	0.32231
0.433479	0.45338	0.234144	0.450215	0.535004
0.366685	0.362148	0.219466	0.571681	0.60102
0.382069	0.405196	0.234509	0.582411	0.519066
0.250212	0.3623	0.215729	0.59453	0.501699
0.532956	0.49256	0.141946	0.37835	0.371805
0.554616	0.528333	0.141623	0.350773	0.368008
0.184809	0.269096	0.239049	0.568452	0.678928
0.219422	0.318187	0.286794	0.567211	0.583435
0.311836	0.334884	0.23533	0.580933	0.624534
0.474508	0.486526	0.165512	0.411087	0.406149
0.236302	0.284671	0.280364	0.564532	0.683116
0.300444	0.293022	0.252996	0.552857	0.646587
0.183148	0.225302	0.254506	0.572516	0.716532
0.200109	0.245675	0.227695	0.565145	0.685388
0.295236	0.327158	0.270848	0.565246	0.571767
0.413882	0.384786	0.226839	0.514796	0.597407
0.26023	0.312432	0.275478	0.557774	0.612135
0.486315	0.510046	0.145747	0.412026	0.353925
0.353449	0.324929	0.292633	0.564565	0.649611
0.300883	0.322969	0.294017	0.540899	0.64642
0.443208	0.516251	0.142605	0.470152	0.493755
0.441499	0.513537	0.150148	0.447295	0.442491
0.309047	0.249504	0.21895	0.568112	0.720816
0.245936	0.22324	0.219266	0.600247	0.714594
0.247182	0.226047	0.216394	0.586463	0.730749
0.2358	0.257806	0.234037	0.583954	0.700648
0.2005	0.233364	0.230174	0.585498	0.69843
0.225834	0.218759	0.223697	0.584535	0.745268
0.171411	0.196001	0.219851	0.575993	0.733219
0.162578	0.205117	0.226099	0.582958	0.711515
0.149176	0.201754	0.227206	0.587573	0.717715
0.179015	0.215603	0.235099	0.581475	0.716631
0.865127	0.79172	0.11672	0.212946	0.224402
0.591952	0.550851	0.125828	0.357877	0.364074
0.411869	0.45541	0.168997	0.522908	0.457032
0.395871	0.522234	0.18481	0.481001	0.411344
0.279379	0.383884	0.222352	0.59438	0.513432
0.215268	0.365221	0.233513	0.591893	0.510986
0.887111	0.759803	0.136908	0.219339	0.274379
0.897446	0.804435	0.137632	0.21282	0.224787
0.421759	0.383279	0.20381	0.49478	0.545468
0.281063	0.291064	0.229914	0.577707	0.633446
0.210505	0.286479	0.239958	0.583638	0.633505
0.271225	0.301253	0.233081	0.574243	0.637071
0.291148	0.322354	0.219809	0.559308	0.601794
0.273333	0.319694	0.226809	0.565261	0.617079
0.18844	0.368045	0.241862	0.585324	0.504383
0.278608	0.424378	0.249534	0.559149	0.489015
0.189197	0.207616	0.244558	0.577028	0.733552
0.382942	0.289831	0.208421	0.534366	0.693799
0.229951	0.290069	0.273144	0.608555	0.629307
0.291154	0.290076	0.231664	0.568488	0.65437
0.293975	0.334478	0.239877	0.573602	0.583422
0.36067	0.382571	0.228958	0.532432	0.513931
0.292248	0.254805	0.207939	0.553119	0.700254
0.32727	0.308819	0.214308	0.552711	0.646722
0.227779	0.229889	0.221981	0.565659	0.718225
0.278453	0.291594	0.217174	0.55971	0.603265
0.277776	0.216129	0.217906	0.565506	0.753006
0.211841	0.218672	0.20739	0.58441	0.709951
0.391737	0.366284	0.192947	0.526473	0.518916
0.475677	0.464806	0.208433	0.441163	0.565752
0.326851	0.358051	0.222369	0.550771	0.565456
0.827436	0.768645	0.118604	0.23406	0.235673
0.458617	0.543799	0.142263	0.432982	0.398095
0.410589	0.422815	0.178325	0.493343	0.488723
0.371545	0.425732	0.173325	0.564691	0.501397
0.337086	0.357771	0.186858	0.56232	0.561413
0.25848	0.326879	0.206781	0.572027	0.589153
0.317403	0.361844	0.192362	0.57259	0.544354
0.370081	0.434928	0.160244	0.541695	0.447833
0.399682	0.461172	0.207069	0.512855	0.477951
0.381274	0.446844	0.21077	0.547488	0.489664
0.389898	0.309653	0.199215	0.559525	0.657333
0.249928	0.245784	0.242418	0.561836	0.715451
0.25064	0.26998	0.227104	0.574823	0.671722
0.215756	0.437942	0.175512	0.586061	0.375425
0.272608	0.370603	0.24498	0.577314	0.524446
0.201143	0.272308	0.261103	0.574107	0.661117
0.198656	0.244037	0.234634	0.573122	0.694929
0.264527	0.308347	0.273571	0.568396	0.63557
0.347255	0.435968	0.292812	0.575627	0.508094
0.318984	0.328901	0.242869	0.572905	0.614603
0.356858	0.386481	0.212021	0.547	0.544551
0.253152	0.21701	0.221112	0.571024	0.731307
0.320743	0.264458	0.207859	0.573288	0.694191
0.669078	0.677097	0.141953	0.242392	0.316079
0.798436	0.777179	0.112331	0.215963	0.220284
0.299762	0.361022	0.250414	0.592207	0.560906
0.133665	0.00873098	0.15738	0.30432	0.0853779
0.331322	0.324098	0.212896	0.575111	0.613437
0.249322	0.289917	0.217196	0.576186	0.618002
0.237328	0.294004	0.232448	0.568967	0.628779
0.242991	0.251928	0.224754	0.571487	0.679358
0.236563	0.231624	0.227032	0.580748	0.716789
0.219807	0.208897	0.21747	0.57781	0.738725
0.21834	0.208494	0.216771	0.570063	0.742823
0.175137	0.207811	0.220969	0.580229	0.721505
0.186707	0.222453	0.222624	0.573638	0.711367
0.171799	0.249099	0.229667	0.579548	0.665232
0.790373	0.76153	0.115121	0.249063	0.27068
0.248035	0.47461	0.190344	0.554717	0.362259
0.28519	0.326332	0.230925	0.584237	0.569049
0.277028	0.41912	0.231971	0.559765	0.506856
0.277605	0.484882	0.224646	0.56905	0.352858
0.752896	0.705494	0.126818	0.252374	0.274667
0.356773	0.465589	0.230037	0.536284	0.455034
0.736906	0.692076	0.137375	0.25328	0.279645
0.590836	0.546464	0.126075	0.292091	0.416647
0.3405	0.364263	0.240217	0.561207	0.561178
0.220079	0.287331	0.228408	0.582658	0.632454
0.26062	0.306514	0.225442	0.576121	0.611313
0.234227	0.290063	0.238292	0.573369	0.642733
0.167269	0.248064	0.245451	0.572769	0.673199
0.199885	0.33443	0.253017	0.581321	0.559415
0.218684	0.295831	0.2626	0.571238	0.633626
0.253278	0.221075	0.209702	0.485742	0.524172
0.262352	0.416761	0.231882	0.565713	0.48419
0.813917	0.602204	0.143738	0.245335	0.389006
0.266001	0.314957	0.24018	0.594398	0.604663
0.297595	0.444174	0.119406	0.559238	0.43713
0.275698	0.38288	0.30924	0.599778	0.535042
0.273897	0.26383	0.220579	0.57455	0.667995
0.290689	0.265315	0.227928	0.570353	0.691647
0.400356	0.405269	0.2319	0.534144	0.54478
0.321982	0.322105	0.245597	0.537617	0.630782
0.337286	0.269109	0.215982	0.543735	0.69854
0.203185	0.208658	0.215683	0.597932	0.719438
0.368944	0.401386	0.222444	0.564887	0.524378
0.768357	0.743564	0.12441	0.253308	0.264674
0.515018	0.548192	0.122584	0.396069	0.419435
0.366856	0.413542	0.207453	0.533987	0.500534
0.344662	0.299965	0.180516	0.540334	0.6455
0.397947	0.431995	0.231168	0.538914	0.49249
0.3866	0.343182	0.181089	0.546604	0.606788
0.365914	0.393531	0.205761	0.587683	0.517748
0.341285	0.418788	0.172531	0.57051	0.463519
0.83132	0.777472	0.119131	0.211703	0.224343
0.348592	0.400984	0.211078	0.568045	0.519949
0.358165	0.330481	0.210454	0.555894	0.619813
0.319817	0.292354	0.187426	0.57572	0.65263
0.335055	0.351866	0.218903	0.559305	0.581808
0.314802	0.301831	0.202449	0.563803	0.617061
0.524425	0.531934	0.188207	0.371416	0.436148
0.659547	0.632242	0.14546	0.300081	0.341356
0.259796	0.393673	0.303275	0.591249	0.506965
0.240716	0.215271	0.218505	0.568075	0.743394
0.161406	0.189779	0.239248	0.578204	0.758012
0.163834	0.196504	0.246027	0.574721	0.744576
0.18691	0.156809	0.239325	0.573043	0.81263
0.218445	0.190554	0.22239	0.571709	0.770622
0.265493	0.301361	0.224219	0.57698	0.619603
0.288176	0.301303	0.247345	0.583154	0.633867
0.337152	0.312712	0.213272	0.567577	0.637465
0.235662	0.184865	0.211798	0.587598	0.773187
0.227787	0.248648	0.214635	0.585807	0.684525
0.299359	0.312717	0.22162	0.580946	0.639912
0.335984	0.319509	0.213945	0.579147	0.62035
0.25654	0.305388	0.271461	0.55964	0.636488
0.245272	0.306592	0.236152	0.566802	0.620558
0.205683	0.301371	0.214591	0.575003	0.599618
0.259749	0.29847	0.213854	0.579021	0.617415
0.254391	0.219655	0.208142	0.583103	0.724146
0.196871	0.236884	0.216896	0.573627	0.691426
0.22604	0.240368	0.22054	0.581751	0.690451
0.234244	0.212242	0.225009	0.588132	0.743695
0.332547	0.281467	0.189652	0.570983	0.682401
0.233656	0.218386	0.217484	0.582224	0.718049
0.224496	0.208451	0.216794	0.579184	0.736056
0.237612	0.225368	0.214299	0.57623	0.718962
0.193074	0.214515	0.222848	0.575226	0.724102
0.206363	0.182521	0.22099	0.582934	0.7693
0.559079	0.649984	0.102926	0.320456	0.318151
0.674918	0.709406	0.117466	0.279284	0.269087
0.774606	0.637161	0.121785	0.258692	0.30934
0.685442	0.691988	0.115452	0.279563	0.267689
0.309012	0.436376	0.16396	0.564513	0.443386
0.659138	0.573004	0.117972	0.284133	0.362675
0.296858	0.54646	0.233718	0.533586	0.332744
0.16917	0.463986	0.241703	0.583655	0.364623
0.173226	0.375841	0.22411	0.585954	0.472197
0.847481	0.750672	0.105211	0.217888	0.244572
0.569507	0.482196	0.128474	0.322649	0.439753
0.2606	0.313036	0.242958	0.569624	0.621711
0.369143	0.302556	0.239133	0.585212	0.667464
0.238845	0.276739	0.24781	0.586031	0.652355
0.370668	0.342885	0.190109	0.5249	0.603758
0.234333	0.292537	0.241836	0.576164	0.637369
0.17854	0.24322	0.253864	0.568985	0.688997
0.220855	0.246248	0.244591	0.573716	0.689148
0.180973	0.221363	0.227953	0.576144	0.709479
0.176011	0.251664	0.228338	0.571257	0.662139
0.266909	0.26969	0.221001	0.564759	0.674089
0.178017	0.237237	0.238379	0.570656	0.690807
0.230885	0.249009	0.226484	0.563031	0.692005
0.348375	0.334902	0.237403	0.553885	0.605139
0.431431	0.425864	0.244131	0.463345	0.462112
0.126719	0.242362	0.237585	0.605848	0.649903
0.307731	0.215845	0.213643	0.568905	0.766167
0.245044	0.249581	0.214634	0.571052	0.69874
0.217898	0.269489	0.237636	0.585268	0.654189
0.397527	0.411624	0.264352	0.507084	0.532232
0.367545	0.260741	0.198087	0.544116	0.725074
0.393836	0.479656	0.238899	0.474228	0.446902
0.40616	0.534083	0.13839	0.48932	0.332182
0.337694	0.358409	0.203456	0.549506	0.559963
0.461842	0.518383	0.144357	0.428741	0.393971
0.403823	0.392779	0.185942	0.541738	0.536304
0.34978	0.324493	0.195203	0.548504	0.624685
0.337436	0.409361	0.167984	0.548727	0.474101
0.305386	0.402239	0.223954	0.588274	0.505225
0.378707	0.444165	0.236374	0.566559	0.471902
0.531776	0.599687	0.130907	0.356301	0.35808
0.685197	0.692217	0.116628	0.25325	0.280409
0.288481	0.296506	0.261025	0.582608	0.637176
0.260826	0.305157	0.187454	0.571137	0.599186
0.338897	0.284994	0.176176	0.573551	0.651455
0.253204	0.263944	0.19741	0.590535	0.660752
0.283335	0.21284	0.190742	0.603567	0.743939
0.200579	0.197653	0.211286	0.5765	0.750649
0.29583	0.272716	0.23007	0.575189	0.681361
0.216522	0.23849	0.2386	0.572564	0.702956
0.255425	0.161949	0.1942	0.571453	0.815269
0.315761	0.317177	0.219225	0.573062	0.617187
0.25895	0.442207	0.256991	0.552605	0.433293
0.302768	0.420112	0.218638	0.547271	0.446405
0.201023	0.270129	0.231489	0.583971	0.636334
0.153303	0.288257	0.256957	0.589722	0.604696
0.182122	0.225867	0.22435	0.576863	0.715918
0.260188	0.275115	0.219421	0.576251	0.645711
0.307809	0.295066	0.211065	0.56465	0.657732
0.218635	0.215528	0.244946	0.571464	0.740775
0.302994	0.304926	0.240574	0.571536	0.651938
0.27039	0.292613	0.232755	0.576191	0.643816
0.241129	0.264109	0.243315	0.571847	0.680052
0.218749	0.25546	0.232614	0.580454	0.665964
0.231941	0.273235	0.223973	0.5777	0.651679
0.205561	0.208085	0.215333	0.585573	0.728408
0.197517	0.197981	0.201786	0.598941	0.733123
0.197407	0.199212	0.225164	0.592449	0.739487
0.16704	0.195944	0.222793	0.596133	0.735056
0.177111	0.218772	0.220962	0.593161	0.700236
0.184094	0.191456	0.219182	0.599148	0.743299
0.219908	0.180835	0.221011	0.590983	0.776517
0.227048	0.208516	0.215669	0.594446	0.735516
0.2193	0.201779	0.221505	0.587646	0.744455
0.231749	0.20759	0.219245	0.584942	0.739946
0.159383	0.189241	0.221003	0.575717	0.744276
0.840356	0.791743	0.115812	0.241047	0.293474
0.467826	0.50481	0.165447	0.426885	0.419785
0.750437	0.67906	0.122844	0.285381	0.338016
0.667535	0.620869	0.112118	0.305638	0.322479
0.828896	0.776447	0.122514	0.219799	0.224619
0.263467	0.360553	0.231957	0.586547	0.508064
0.219283	0.410972	0.237433	0.577124	0.433181
0.200215	0.448805	0.249446	0.57569	0.388097
0.795599	0.653553	0.0967509	0.234889	0.31886
0.90605	0.717886	0.109148	0.221183	0.36475
0.322479	0.398282	0.210202	0.550231	0.48908
0.297572	0.395211	0.226422	0.588542	0.501069
0.342766	0.319403	0.246305	0.572168	0.645706
0.239893	0.236554	0.22957	0.57041	0.706354
0.257295	0.315038	0.250135	0.573835	0.61269
0.227461	0.250139	0.244885	0.58171	0.684635
0.23179	0.321684	0.238314	0.583368	0.585139
0.245065	0.334235	0.239299	0.555768	0.575573
0.222803	0.220812	0.226033	0.583547	0.722588
0.166315	0.20222	0.222084	0.577362	0.727782
0.178935	0.218256	0.223517	0.572069	0.709171
0.294568	0.299645	0.205886	0.561526	0.639757
0.276526	0.292597	0.221201	0.555832	0.646994
0.268626	0.228247	0.220436	0.578633	0.731479
0.263191	0.197116	0.206505	0.558054	0.769617
0.265323	0.21646	0.215784	0.566676	0.753603
0.364009	0.28888	0.215013	0.549363	0.68418
0.704881	0.595687	0.132911	0.296764	0.345377
0.24951	0.418737	0.17487	0.559088	0.41115
0.333562	0.341937	0.23532	0.573901	0.615464
0.307008	0.227899	0.221985	0.563704	0.759616
0.377824	0.328535	0.174831	0.535503	0.623816
0.415505	0.51904	0.11968	0.485902	0.369919
0.345028	0.378566	0.217026	0.560035	0.55812
0.500373	0.510854	0.170285	0.381439	0.454411
0.353363	0.337665	0.196869	0.582608	0.60078
0.311376	0.377898	0.210493	0.578819	0.523879
0.266913	0.356088	0.217586	0.568396	0.548686
0.333343	0.349324	0.216794	0.589744	0.56939
0.229244	0.320227	0.213283	0.601902	0.57129
0.313299	0.326016	0.214217	0.574035	0.604105
0.174972	0.285197	0.211496	0.580332	0.616322
0.184512	0.280415	0.176643	0.592004	0.627275
0.274209	0.28288	0.212284	0.589175	0.640904
0.336326	0.399121	0.189285	0.547548	0.49253
0.649601	0.708597	0.141377	0.255717	0.263518
0.480371	0.623035	0.171436	0.394238	0.307745
0.287559	0.424843	0.230395	0.555753	0.46064
0.289105	0.454873	0.205966	0.559765	0.406142
0.667702	0.698591	0.137788	0.261867	0.285822
0.245112	0.373326	0.213139	0.593667	0.506364
0.339179	0.350259	0.190666	0.5871	0.569485
0.23169	0.331369	0.209394	0.576203	0.572744
0.232635	0.32915	0.227119	0.570944	0.569384
0.224304	0.290112	0.208591	0.584422	0.616635
0.325689	0.333885	0.214577	0.588782	0.600301
0.277905	0.364022	0.228666	0.581884	0.541959
0.237254	0.243584	0.217315	0.575459	0.694831
0.201987	0.205534	0.228106	0.576864	0.73454
0.181382	0.211158	0.219345	0.575644	0.726723
0.190157	0.215123	0.219488	0.574283	0.726063
0.24183	0.210199	0.22121	0.570107	0.746915
0.212431	0.203045	0.220266	0.586239	0.748283
0.253151	0.244596	0.237586	0.574397	0.709051
0.241506	0.26677	0.213432	0.568053	0.655658
0.172486	0.228328	0.227122	0.57256	0.698569
0.22512	0.224486	0.213392	0.581376	0.716984
0.234364	0.222955	0.223333	0.588035	0.729591
0.224476	0.275838	0.214552	0.57463	0.637332
0.183883	0.248767	0.217104	0.586313	0.66039
0.183434	0.224142	0.219576	0.604434	0.698395
0.210016	0.239684	0.215718	0.586167	0.683872
0.240553	0.240353	0.216273	0.60255	0.685568
0.152144	0.203644	0.228289	0.608359	0.719205
0.168734	0.211259	0.230213	0.595425	0.719002
0.200702	0.225653	0.219293	0.592695	0.696794
0.151468	0.226376	0.222969	0.600989	0.685141
0.700703	0.598323	0.118151	0.298376	0.4
0.811067	0.655631	0.124049	0.212526	0.4
0.551349	0.590203	0.126428	0.349844	0.365089
0.356915	0.427309	0.184959	0.558162	0.44964
0.300156	0.388617	0.232007	0.576829	0.517639
0.268001	0.417588	0.217761	0.582753	0.465659
0.248011	0.451774	0.24454	0.582414	0.406399
0.219127	0.458268	0.247127	0.588256	0.400872
0.455124	0.539791	0.122936	0.435537	0.326264
0.316356	0.367298	0.208491	0.566497	0.555215
0.753369	0.70944	0.142737	0.259509	0.268912
0.353759	0.378328	0.232226	0.556863	0.559202
0.345225	0.382222	0.275524	0.574966	0.569081
0.30185	0.313232	0.207759	0.561075	0.626863
0.22609	0.300135	0.250057	0.560976	0.623813
0.279663	0.26941	0.262453	0.582118	0.694345
0.29282	0.247006	0.236153	0.536612	0.74004
0.22419	0.299305	0.251401	0.567261	0.626263
0.213857	0.249611	0.238334	0.568827	0.686222
0.182056	0.201073	0.230184	0.5734	0.741399
0.306479	0.25853	0.216613	0.54037	0.702398
0.193716	0.190299	0.222726	0.564993	0.762953
0.251473	0.249387	0.215449	0.561829	0.706667
0.331294	0.254918	0.206894	0.570317	0.709943
0.312152	0.281202	0.225871	0.561104	0.685045
0.205426	0.269732	0.234123	0.576187	0.64432
0.349387	0.319438	0.21771	0.547671	0.635098
0.345178	0.406595	0.248899	0.558942	0.534277
0.422464	0.547166	0.271852	0.447489	0.414434
0.505662	0.542219	0.195206	0.405003	0.375401
0.22733	0.225798	0.229921	0.590275	0.719681
0.295301	0.246441	0.211904	0.581199	0.71047
0.328311	0.3978	0.188089	0.553003	0.516836
0.594733	0.691146	0.141434	0.356277	0.230253
0.910085	0.778748	0.141239	0.217265	0.239881
0.663733	0.577276	0.125719	0.27848	0.43977
0.441969	0.579857	0.165519	0.436986	0.352395
0.336996	0.435582	0.240989	0.574365	0.467793
0.324534	0.441027	0.205172	0.567825	0.442103
0.27342	0.346676	0.254599	0.593795	0.570997
0.254504	0.417217	0.270516	0.579511	0.477589
0.743491	0.696193	0.139857	0.245714	0.316492
0.623045	0.645596	0.15207	0.289392	0.346494
0.328225	0.42488	0.226098	0.561384	0.47096
0.334835	0.423823	0.374893	0.558977	0.538127
0.279899	0.434771	0.244081	0.573977	0.441081
0.353715	0.464353	0.229054	0.556246	0.431851
0.350233	0.444087	0.28112	0.56448	0.469063
0.30405	0.506478	0.613377	0.471802	0.526791
0.288242	0.504354	0.560722	0.459132	0.501534
0.337921	0.494197	0.242565	0.572646	0.386003
0.394694	0.532888	0.211887	0.546226	0.364657
0.36828	0.458672	0.270718	0.567402	0.45491
0.277082	0.466841	0.218485	0.559638	0.388987
0.214602	0.378656	0.289336	0.57191	0.51667
0.584169	0.613733	0.139296	0.298677	0.32574
0.308568	0.467741	0.211811	0.5415	0.401873
0.276418	0.407518	0.222883	0.57535	0.476986
0.350113	0.301218	0.186809	0.576476	0.643437
0.305478	0.229093	0.193058	0.574657	0.730747
0.246344	0.249499	0.216308	0.564941	0.697304
0.193294	0.206743	0.223043	0.573281	0.742567
0.186385	0.185782	0.226211	0.575074	0.757321
0.196798	0.157398	0.217956	0.571982	0.804738
0.227092	0.198453	0.208787	0.589035	0.751875
0.252722	0.254904	0.227903	0.567314	0.690296
0.263165	0.285114	0.207431	0.568502	0.634491
0.227333	0.230214	0.221112	0.575928	0.708544
0.248891	0.229595	0.207232	0.57589	0.715684
0.239275	0.192294	0.211906	0.587017	0.762271
0.27934	0.216381	0.210694	0.588604	0.74379
0.196509	0.190673	0.207523	0.603619	0.747097
0.195135	0.243437	0.21211	0.59052	0.676303
0.294638	0.30197	0.203279	0.585148	0.617095
0.213727	0.246965	0.213035	0.592125	0.676802
0.221075	0.226482	0.217561	0.59796	0.716467
0.232939	0.243866	0.226958	0.59456	0.678242
0.157307	0.256597	0.239906	0.599012	0.64059
0.193264	0.239809	0.233763	0.590177	0.68342
0.740185	0.64652	0.121466	0.230309	0.318529
0.59038	0.578776	0.112302	0.347194	0.4
0.599099	0.602799	0.115626	0.337918	0.370086
0.427248	0.59514	0.198753	0.463171	0.313371
0.305753	0.352289	0.19439	0.548777	0.55586
0.225777	0.375184	0.243176	0.572942	0.505822
0.354088	0.41597	0.223646	0.526495	0.486007
0.522793	0.605354	0.153289	0.389165	0.358044
0.550619	0.633181	0.131651	0.382232	0.273979
0.372004	0.434828	0.229087	0.561576	0.489888
0.843178	0.725881	0.120725	0.22457	0.313529
0.314501	0.342391	0.191728	0.552456	0.57218
0.410339	0.39548	0.217337	0.475191	0.574723
0.296835	0.303294	0.224022	0.576723	0.630535
0.235956	0.310455	0.25232	0.582892	0.618671
0.325348	0.307704	0.259939	0.559693	0.660085
0.285764	0.261931	0.224063	0.577984	0.68957
0.339725	0.254663	0.214594	0.547298	0.725752
0.147087	0.209034	0.204828	0.583589	0.701031
0.30112	0.247017	0.222332	0.560758	0.724695
0.302924	0.305416	0.198122	0.557772	0.633864
0.395945	0.426546	0.169602	0.495294	0.50102
0.40961	0.432359	0.275565	0.546517	0.534437
0.464001	0.597745	0.193407	0.4343	0.350471
0.256688	0.320183	0.219346	0.569849	0.594372
0.391419	0.486053	0.251217	0.493654	0.468842
0.29318	0.365313	0.246967	0.583432	0.535909
0.234922	0.263019	0.230194	0.581509	0.662449
0.311709	0.338289	0.220435	0.587128	0.577639
0.318861	0.305215	0.2189	0.590328	0.63567
0.311257	0.326885	0.218095	0.576671	0.608534
0.248609	0.24982	0.211295	0.595586	0.681698
0.241058	0.259231	0.208723	0.582009	0.660347
0.454361	0.462636	0.137592	0.445177	0.453315
0.806428	0.732483	0.116015	0.217193	0.267089
0.506463	0.550866	0.184697	0.359801	0.387477
0.679948	0.729351	0.140887	0.261826	0.231045
0.283983	0.472012	0.364786	0.55154	0.455883
0.304834	0.390387	0.440703	0.55626	0.606868
0.30911	0.462289	0.445754	0.550407	0.523106
0.309544	0.420812	0.225437	0.5803	0.464564
0.300102	0.426486	0.264559	0.567756	0.472408
0.343912	0.463764	0.295191	0.553363	0.443157
0.284129	0.488667	0.646816	0.497109	0.561231
0.289093	0.414234	0.524286	0.515707	0.60385
0.312941	0.464963	0.611357	0.493828	0.594284
0.301611	0.433805	0.543895	0.52286	0.597496
0.279255	0.425747	0.554565	0.501586	0.596165
0.314921	0.515769	0.648667	0.475556	0.540144
0.259257	0.440463	0.563115	0.492151	0.59022
0.32205	0.577762	0.769407	0.41722	0.514595
0.278928	0.56982	0.774033	0.426376	0.513699
0.321883	0.470131	0.589843	0.469995	0.579916
0.273227	0.508115	0.651112	0.482822	0.529868
0.26083	0.417824	0.47485	0.504136	0.580103
0.365485	0.524123	0.543077	0.501791	0.492381
0.363263	0.468987	0.288696	0.547246	0.443211
0.346995	0.396122	0.236941	0.574441	0.526873
0.333905	0.417688	0.244793	0.578908	0.492618
0.249664	0.312223	0.225965	0.60403	0.599306
0.203577	0.251941	0.225197	0.577121	0.682499
0.239954	0.306338	0.212011	0.583911	0.602563
0.264776	0.269597	0.206657	0.576	0.673511
0.169477	0.170959	0.213363	0.585923	0.771704
0.188399	0.1822	0.213685	0.574659	0.769337
0.197311	0.186952	0.233348	0.572484	0.774077
0.241097	0.219614	0.210449	0.570446	0.707636
0.186717	0.179902	0.225758	0.584036	0.772545
0.179993	0.164515	0.226414	0.589993	0.791868
0.21358	0.176904	0.213429	0.585818	0.778245
0.176793	0.185628	0.220054	0.591934	0.751929
0.205111	0.189945	0.212149	0.595157	0.753845
0.195143	0.203261	0.217733	0.590886	0.735314
0.225691	0.236432	0.210914	0.584828	0.697824
0.176044	0.229058	0.219371	0.578874	0.691771
0.200212	0.303144	0.20899	0.57817	0.594608
0.184131	0.250163	0.221388	0.58995	0.658676
0.195378	0.218024	0.212971	0.598197	0.700074
0.208885	0.231304	0.21193	0.602177	0.687979
0.618715	0.577697	0.122862	0.328005	0.4
0.433832	0.476166	0.194206	0.497777	0.373744
0.271059	0.346427	0.221158	0.562621	0.580106
0.358389	0.476586	0.157006	0.482862	0.316136
0.598111	0.579163	0.179639	0.334225	0.345546
0.254246	0.503484	0.287954	0.573816	0.383027
0.343328	0.567303	0.19767	0.566947	0.376736
0.393338	0.388723	0.201138	0.549927	0.571811
0.315815	0.463476	0.227066	0.588018	0.444717
0.390423	0.351676	0.209311	0.538133	0.591493
0.360993	0.341462	0.211919	0.561614	0.601546
0.305514	0.336788	0.248471	0.575827	0.579894
0.320662	0.486375	0.231504	0.581617	0.484295
0.265918	0.335321	0.229991	0.569229	0.607565
0.303799	0.278197	0.218063	0.572561	0.696974
0.265295	0.232406	0.20541	0.579831	0.711994
0.309077	0.269232	0.191479	0.583854	0.666528
0.345113	0.282716	0.205545	0.552216	0.74609
0.228217	0.302944	0.221153	0.564049	0.624971
0.7202	0.560067	0.147658	0.2534	0.434021
0.315535	0.474011	0.236966	0.552954	0.469769
0.265803	0.354366	0.256767	0.572157	0.588125
0.239707	0.355266	0.245908	0.560134	0.61896
0.240541	0.310607	0.229265	0.582268	0.644166
0.304441	0.28294	0.248126	0.534873	0.709149
0.19024	0.215293	0.220183	0.579265	0.755346
0.211852	0.214607	0.21875	0.575747	0.729074
0.205553	0.207025	0.219549	0.575225	0.733361
0.239869	0.221742	0.214711	0.590985	0.614465
0.608443	0.694585	0.135733	0.338717	0.282046
0.665823	0.667919	0.153435	0.239554	0.306332
0.499963	0.542392	0.163128	0.395426	0.41889
0.331123	0.515271	0.446432	0.528777	0.489207
0.37104	0.657361	0.249154	0.484424	0.311443
0.319465	0.392324	0.241559	0.53541	0.416024
0.289725	0.433022	0.477242	0.531355	0.583599
0.266362	0.362098	0.408473	0.557847	0.662919
0.275962	0.367844	0.508391	0.525138	0.693335
0.256281	0.309596	0.410803	0.555667	0.688259
0.228638	0.353847	0.460819	0.545764	0.64952
0.290239	0.467881	0.551036	0.491966	0.543448
0.328838	0.443952	0.610934	0.479938	0.602553
0.293136	0.417636	0.489212	0.535583	0.600336
0.270705	0.389666	0.443708	0.549973	0.634643
0.26013	0.361113	0.433801	0.552064	0.621402
0.26145	0.310417	0.371138	0.559383	0.655107
0.260252	0.320811	0.380848	0.563727	0.674844
0.261244	0.328607	0.373853	0.553388	0.664653
0.218631	0.287501	0.344175	0.558774	0.671612
0.248816	0.329349	0.366099	0.54648	0.639379
0.277517	0.329905	0.346293	0.552084	0.636344
0.248421	0.3072	0.271108	0.546791	0.634087
0.277025	0.312112	0.359446	0.553117	0.67173
0.23057	0.301244	0.420667	0.546352	0.679176
0.238123	0.354944	0.486947	0.514456	0.576808
0.237499	0.409874	0.452056	0.526932	0.576146
0.246889	0.404137	0.369035	0.547961	0.541633
0.366046	0.438645	0.245925	0.573265	0.466851
0.292769	0.491971	0.226488	0.575296	0.416497
0.342511	0.394672	0.196583	0.523118	0.382741
0.218278	0.374641	0.235021	0.57153	0.480705
0.314172	0.484498	0.220586	0.572459	0.455864
0.363306	0.55852	0.186694	0.525539	0.399701
0.368079	0.379892	0.240026	0.50587	0.440158
0.449356	0.401331	0.19719	0.424816	0.402717
0.432781	0.38242	0.261231	0.433652	0.447296
0.278131	0.2594	0.235611	0.559379	0.58993
0.217765	0.245004	0.22245	0.560821	0.664116
0.190882	0.254586	0.223095	0.569234	0.679456
0.219476	0.232682	0.208248	0.581146	0.667867
0.224435	0.146212	0.205499	0.594141	0.784718
0.286828	0.203675	0.202579	0.589792	0.767317
0.185693	0.195624	0.206646	0.599294	0.742059
0.200098	0.206463	0.212689	0.600755	0.735327
0.23592	0.252793	0.206676	0.586855	0.713948
0.197403	0.23744	0.226866	0.594333	0.711413
0.214015	0.248488	0.204346	0.592029	0.702961
0.229373	0.242911	0.214783	0.588287	0.696763
0.036821	0.0336324	0.0777109	0.0160344	0.195623
0.294291	0.373002	0.241249	0.550984	0.517875
0.244588	0.317728	0.228467	0.578582	0.589216
0.298704	0.385179	0.248505	0.557803	0.503022
0.482334	0.60093	0.150098	0.403502	0.346464
0.345685	0.476464	0.285995	0.552133	0.436791
0.240151	0.301392	0.250825	0.572611	0.609643
0.355761	0.377561	0.210441	0.567741	0.539359
0.335947	0.326049	0.256011	0.53841	0.636327
0.321199	0.356453	0.245628	0.55842	0.573388
0.303404	0.363406	0.224163	0.569937	0.543011
0.325874	0.343794	0.207111	0.555895	0.573063
0.279962	0.310295	0.259325	0.580217	0.628218
0.639678	0.602899	0.112278	0.274523	0.384437
0.349123	0.350982	0.242405	0.557804	0.589848
0.311017	0.227138	0.207426	0.565347	0.733108
0.329297	0.26674	0.192115	0.5618	0.682537
0.281974	0.28247	0.213288	0.557843	0.647535
0.318201	0.323293	0.209585	0.555858	0.607979
0.301583	0.30471	0.236018	0.553751	0.627172
0.269395	0.255541	0.222657	0.573252	0.665583
0.277348	0.210966	0.218345	0.552033	0.721543
0.186425	0.225394	0.222359	0.578716	0.712413
0.278327	0.278079	0.217098	0.577943	0.680961
0.643955	0.645996	0.133955	0.31366	0.382947
0.635503	0.676897	0.138657	0.277008	0.311167
0.335553	0.477249	0.173962	0.54617	0.378815
0.644688	0.631764	0.135725	0.295388	0.309976
0.267406	0.44143	0.32366	0.577801	0.429294
0.279403	0.452691	0.318132	0.561957	0.426724
0.339479	0.532543	0.455275	0.496716	0.422006
0.304083	0.527812	0.387841	0.563798	0.426768
0.333695	0.490348	0.280024	0.554027	0.38692
0.299681	0.399761	0.333761	0.561826	0.546618
0.343999	0.461577	0.489815	0.538772	0.534967
0.290109	0.361656	0.408661	0.546204	0.620059
0.309769	0.377638	0.328194	0.563784	0.597125
0.336287	0.340156	0.270865	0.569726	0.62232
0.197596	0.282996	0.410213	0.566868	0.716244
0.219228	0.212197	0.251208	0.567348	0.745245
0.206076	0.226715	0.255127	0.568923	0.721328
0.263897	0.347092	0.390355	0.559047	0.628537
0.268082	0.357214	0.414221	0.554448	0.634362
0.228571	0.278933	0.289098	0.57086	0.673804
0.23863	0.316437	0.332825	0.555188	0.665239
0.201891	0.285965	0.292318	0.558461	0.660908
0.227005	0.273271	0.310916	0.572041	0.69299
0.199798	0.213696	0.264768	0.576366	0.743513
0.189524	0.255899	0.293563	0.566823	0.694953
0.210528	0.219103	0.24629	0.571046	0.728475
0.210394	0.25412	0.270714	0.574472	0.684975
0.238825	0.298948	0.325108	0.555197	0.664833
0.231829	0.318158	0.309438	0.556698	0.628629
0.23993	0.319313	0.366513	0.544703	0.654476
0.226359	0.257883	0.287669	0.563003	0.70233
0.287211	0.335719	0.399548	0.542855	0.668821
0.28539	0.35593	0.409452	0.54163	0.644833
0.284269	0.400199	0.463388	0.521513	0.603694
0.256947	0.423866	0.47138	0.501642	0.570197
0.351381	0.462199	0.333603	0.54111	0.4626
0.326251	0.431815	0.34132	0.543553	0.518615
0.208365	0.387913	0.242851	0.573818	0.474777
0.303325	0.381979	0.220844	0.56144	0.526958
0.269108	0.359326	0.22894	0.575875	0.538528
0.325525	0.37565	0.225573	0.572932	0.527634
0.339404	0.366792	0.205495	0.560667	0.540821
0.341397	0.390038	0.199948	0.555646	0.52262
0.270532	0.347686	0.212144	0.575271	0.551904
0.34063	0.40312	0.225392	0.566357	0.497462
0.394256	0.473186	0.196849	0.524809	0.448714
0.235968	0.279909	0.215134	0.560876	0.653831
0.315262	0.319612	0.194042	0.554642	0.602779
0.239887	0.295115	0.203566	0.570832	0.603441
0.236429	0.260333	0.208678	0.585145	0.682845
0.256272	0.24084	0.201875	0.587351	0.708182
0.239887	0.256887	0.20285	0.583133	0.685181
0.249698	0.264601	0.207855	0.581341	0.67534
0.290234	0.278903	0.211859	0.566964	0.700124
0.197232	0.240122	0.225085	0.589186	0.686619
0.36032	0.391076	0.230528	0.578574	0.528089
0.313892	0.468737	0.18447	0.607183	0.371076
0.381831	0.424731	0.182876	0.509184	0.462739
0.365612	0.52359	0.2274	0.57433	0.34211
0.37049	0.403512	0.264109	0.579498	0.514628
0.286517	0.344186	0.245529	0.581265	0.549849
0.363679	0.278675	0.221478	0.546194	0.708777
0.234543	0.214736	0.248128	0.581023	0.742663
0.255726	0.23388	0.242192	0.578531	0.727886
0.263615	0.299183	0.230692	0.571856	0.651611
0.308366	0.307899	0.239041	0.577386	0.641755
0.403197	0.372195	0.206039	0.535686	0.60692
0.375719	0.323747	0.198399	0.558056	0.625211
0.360725	0.298469	0.202541	0.566549	0.637319
0.373117	0.310277	0.195136	0.567311	0.635539
0.393828	0.306159	0.188733	0.535215	0.660244
0.302591	0.27475	0.204065	0.565962	0.671944
0.208726	0.252611	0.241295	0.573056	0.701151
0.234237	0.222261	0.222124	0.578803	0.736874
0.338128	0.340587	0.202315	0.573861	0.574223
0.303468	0.331841	0.214763	0.571681	0.635489
0.637294	0.686898	0.135045	0.304549	0.295141
0.259306	0.425399	0.254855	0.574447	0.451268
0.296244	0.432637	0.290802	0.579738	0.481358
0.298104	0.418157	0.339529	0.572999	0.520088
0.245211	0.401313	0.273437	0.582885	0.477879
0.281143	0.465697	0.271388	0.551492	0.421142
0.296392	0.481153	0.248813	0.574466	0.382346
0.312421	0.482575	0.318293	0.544427	0.40498
0.340035	0.466643	0.536132	0.491349	0.586277
0.327528	0.456772	0.397156	0.549799	0.481097
0.294773	0.382953	0.276568	0.568746	0.528159
0.292027	0.4282	0.31417	0.581969	0.506419
0.333001	0.449828	0.34259	0.564516	0.481296
0.303581	0.440736	0.322357	0.549127	0.465512
0.304865	0.420666	0.398926	0.534866	0.552874
0.288118	0.331098	0.26734	0.564427	0.619839
0.237041	0.262691	0.334254	0.573849	0.713238
0.234538	0.196039	0.225334	0.563879	0.769367
0.228078	0.223094	0.25342	0.571797	0.736247
0.222406	0.301894	0.344056	0.551407	0.667717
0.249213	0.324902	0.346946	0.548946	0.641003
0.279179	0.379323	0.395693	0.543022	0.605325
0.266849	0.277242	0.265704	0.566815	0.678894
0.221862	0.245112	0.239921	0.561867	0.697757
0.190413	0.232955	0.242001	0.575546	0.700979
0.169849	0.199411	0.238211	0.571646	0.746226
0.183675	0.214371	0.225694	0.569463	0.722212
0.181569	0.20284	0.225469	0.569378	0.736702
0.183594	0.21998	0.221939	0.572475	0.710125
0.182288	0.206615	0.228878	0.573788	0.7312
0.170906	0.203379	0.243969	0.579241	0.743395
0.196271	0.212239	0.252733	0.576645	0.736755
0.202805	0.236099	0.277933	0.570995	0.720523
0.238463	0.269019	0.286764	0.564278	0.695075
0.198463	0.234917	0.274703	0.565649	0.715501
0.240642	0.291393	0.336571	0.551373	0.679501
0.228398	0.315461	0.363631	0.545643	0.660451
0.220262	0.362479	0.345245	0.551714	0.573182
0.334898	0.434345	0.363449	0.546226	0.532096
0.336994	0.410158	0.25869	0.560305	0.512296
0.375231	0.520654	0.212366	0.517742	0.398291
0.215134	0.352249	0.232398	0.578871	0.543937
0.28896	0.420107	0.2273	0.563909	0.471008
0.35269	0.38049	0.202828	0.540689	0.536636
0.341123	0.385208	0.203828	0.548889	0.525282
0.239503	0.369739	0.242972	0.568128	0.505022
0.347864	0.436192	0.224664	0.552216	0.444961
0.354142	0.440223	0.220339	0.566603	0.457811
0.329395	0.413577	0.207135	0.584264	0.481003
0.331409	0.410583	0.183128	0.577003	0.467509
0.243937	0.315777	0.215876	0.57053	0.599347
0.357157	0.386603	0.200503	0.561786	0.539356
0.261263	0.367069	0.195663	0.563132	0.517257
0.315908	0.370507	0.186038	0.56165	0.537421
0.335658	0.349103	0.199607	0.571621	0.587776
0.335388	0.348628	0.209868	0.561846	0.581822
0.368266	0.298319	0.184938	0.564963	0.649837
0.215379	0.335675	0.149324	0.577679	0.35017
0.28861	0.449285	0.209538	0.568707	0.415202
0.290331	0.413536	0.230147	0.593604	0.489446
0.335106	0.496892	0.274109	0.606147	0.377947
0.256717	0.353189	0.26239	0.580172	0.520384
0.355949	0.344444	0.224343	0.5507	0.612174
0.368388	0.355079	0.19202	0.539809	0.615454
0.405698	0.449005	0.179896	0.47289	0.500176
0.39596	0.367352	0.202865	0.555355	0.584101
0.356197	0.343832	0.209108	0.550395	0.592866
0.380086	0.326659	0.19934	0.547447	0.625556
0.267839	0.308845	0.187031	0.581664	0.636164
0.360843	0.319627	0.203088	0.553238	0.647442
0.306497	0.329844	0.22982	0.582023	0.677038
0.656095	0.77697	0.125346	0.322918	0.237622
0.599383	0.696617	0.112081	0.36854	0.246376
0.80217	0.721562	0.105884	0.235946	0.235246
0.755226	0.708533	0.12802	0.250734	0.273402
0.347667	0.373994	0.225595	0.611158	0.565458
0.546408	0.567591	0.217114	0.361656	0.470422
0.230533	0.277603	0.228397	0.596825	0.649609
0.299863	0.381537	0.254661	0.575449	0.519932
0.263323	0.413343	0.266585	0.576676	0.467107
0.278646	0.380513	0.272935	0.584821	0.518095
0.289476	0.355309	0.243119	0.590479	0.539197
0.317773	0.355835	0.251695	0.589399	0.58102
0.230976	0.319512	0.264028	0.576582	0.646036
0.337657	0.564245	0.215604	0.531025	0.206228
0.277562	0.443379	0.483382	0.550855	0.552809
0.339995	0.490328	0.41633	0.540503	0.464197
0.325963	0.374666	0.299773	0.544393	0.593844
0.296745	0.344904	0.268162	0.567977	0.63001
0.326626	0.436886	0.513941	0.483779	0.59927
0.333581	0.45871	0.472593	0.523786	0.532375
0.332266	0.462927	0.503963	0.504116	0.543557
0.322072	0.497522	0.538764	0.49124	0.512998
0.318362	0.335496	0.301522	0.559962	0.629198
0.314403	0.34861	0.335968	0.56519	0.630344
0.30322	0.349607	0.27513	0.568151	0.561256
0.221512	0.306712	0.316023	0.562887	0.644332
0.293495	0.320555	0.347949	0.558901	0.669619
0.320271	0.414346	0.423983	0.531608	0.575602
0.365007	0.39765	0.227162	0.496978	0.528956
0.356862	0.40276	0.236376	0.538572	0.545113
0.28986	0.396708	0.391484	0.553214	0.578518
0.269458	0.267028	0.249299	0.564669	0.702183
0.26175	0.293441	0.328354	0.535756	0.670814
0.221778	0.228953	0.226436	0.563595	0.718227
0.184445	0.188634	0.211379	0.56875	0.753945
0.182944	0.190527	0.21156	0.573839	0.750761
0.176612	0.199253	0.216623	0.567573	0.734146
0.169142	0.179598	0.221011	0.579546	0.759137
0.161418	0.164177	0.231471	0.585314	0.783245
0.148882	0.165943	0.222181	0.58957	0.770518
0.222453	0.236198	0.26038	0.55672	0.729446
0.170456	0.192845	0.269272	0.586219	0.757282
0.177258	0.197298	0.249911	0.579335	0.751175
0.183428	0.220028	0.256589	0.573371	0.724091
0.235543	0.271315	0.307696	0.557373	0.706563
0.205941	0.27583	0.294782	0.568253	0.665795
0.262858	0.333356	0.304399	0.556546	0.60311
0.308515	0.412429	0.392071	0.521601	0.561077
0.318404	0.426164	0.400335	0.535862	0.548056
0.349216	0.419664	0.28088	0.566437	0.522706
0.319032	0.43031	0.217307	0.573853	0.465933
0.273606	0.467913	0.322328	0.533944	0.436781
0.355425	0.445194	0.27373	0.555843	0.461544
0.215684	0.371408	0.282845	0.565139	0.535251
0.213095	0.37256	0.263051	0.569692	0.531169
0.214025	0.41231	0.25728	0.560436	0.457846
0.257232	0.453682	0.268486	0.557794	0.443461
0.296536	0.441764	0.247271	0.5587	0.42895
0.309671	0.450546	0.235605	0.544274	0.458674
0.251739	0.399039	0.249949	0.563048	0.486198
0.276315	0.351728	0.264079	0.570695	0.563104
0.325283	0.41855	0.18779	0.578656	0.460971
0.362479	0.431742	0.203509	0.563185	0.47392
0.352979	0.400845	0.205656	0.559281	0.502876
0.338043	0.357746	0.202884	0.561916	0.574178
0.227206	0.349983	0.226042	0.567373	0.497463
0.236213	0.292311	0.206973	0.568978	0.637217
0.355755	0.344882	0.224451	0.564947	0.600672
0.286114	0.335552	0.215439	0.583537	0.549976
0.351705	0.333925	0.215017	0.564535	0.659194
0.269516	0.39853	0.242476	0.559219	0.518636
0.642642	0.672434	0.120944	0.314204	0.306403
0.355152	0.382328	0.192609	0.560316	0.557581
0.401566	0.424524	0.163993	0.499328	0.517488
0.217709	0.381233	0.20618	0.627132	0.492948
0.487009	0.471836	0.20464	0.394243	0.49552
0.586838	0.586568	0.179251	0.346321	0.283955
0.324186	0.494929	0.32217	0.574101	0.367234
0.327185	0.556812	0.242818	0.553823	0.297983
0.506582	0.629671	0.149008	0.408654	0.30057
0.68601	0.694403	0.118405	0.323144	0.290549
0.319003	0.422469	0.258893	0.568518	0.467325
0.361923	0.451169	0.238273	0.542272	0.444407
0.604844	0.589317	0.153615	0.334484	0.361738
0.328345	0.395073	0.268023	0.586952	0.500181
0.258129	0.34	0.24118	0.588116	0.543896
0.240044	0.354509	0.269668	0.598053	0.555128
0.296191	0.310866	0.230455	0.5881	0.613783
0.229068	0.338057	0.255188	0.573394	0.562871
0.586273	0.51276	0.205917	0.293723	0.484831
0.246653	0.346578	0.245474	0.584983	0.548643
0.300116	0.446678	0.320691	0.572768	0.466596
0.339189	0.474599	0.37014	0.557857	0.448863
0.337721	0.337691	0.275733	0.579816	0.592637
0.306833	0.290002	0.247253	0.572208	0.660717
0.245278	0.319764	0.293851	0.561322	0.611528
0.319813	0.366055	0.32754	0.56052	0.562018
0.323993	0.414637	0.39711	0.538051	0.569694
0.31069	0.366726	0.344054	0.551573	0.609404
0.294879	0.345666	0.384818	0.560003	0.643804
0.328121	0.332157	0.317295	0.569087	0.636187
0.311067	0.345564	0.33829	0.560734	0.619254
0.230674	0.230908	0.245461	0.573584	0.723477
0.227792	0.225561	0.245216	0.568697	0.724069
0.266916	0.285391	0.270587	0.566746	0.685258
0.289589	0.356787	0.334541	0.56352	0.610907
0.324302	0.440091	0.459845	0.531077	0.549798
0.316628	0.416865	0.381115	0.555072	0.543935
0.31366	0.392993	0.372566	0.554315	0.577309
0.292517	0.334439	0.317272	0.561301	0.623387
0.310019	0.330132	0.250391	0.578081	0.628644
0.214798	0.288177	0.362991	0.556628	0.712859
0.201747	0.204703	0.221503	0.570395	0.766231
0.196356	0.199255	0.209931	0.571573	0.735046
0.185496	0.18034	0.203245	0.582113	0.762696
0.174863	0.179348	0.214798	0.579799	0.760099
0.203836	0.172666	0.208519	0.58164	0.777812
0.182876	0.168729	0.218086	0.580034	0.786838
0.159724	0.158231	0.21776	0.582983	0.786523
0.187212	0.198178	0.245843	0.57683	0.755661
0.162119	0.166627	0.214732	0.582548	0.775078
0.191108	0.165065	0.236121	0.586533	0.787472
0.16057	0.166278	0.229372	0.584958	0.777771
0.174405	0.191415	0.234743	0.581171	0.747382
0.174296	0.199074	0.245231	0.581542	0.745116
0.185079	0.211129	0.256256	0.581012	0.730858
0.19616	0.238471	0.259715	0.57169	0.697593
0.193689	0.237247	0.250749	0.567684	0.699521
0.213713	0.328416	0.336167	0.559108	0.59673
0.246039	0.329789	0.326135	0.556163	0.611219
0.197022	0.272522	0.26854	0.562808	0.65019
0.198332	0.282499	0.268707	0.566478	0.653725
0.195839	0.322622	0.336841	0.563282	0.607584
0.203035	0.343614	0.335692	0.550942	0.590109
0.207057	0.353887	0.354987	0.556452	0.569213
0.208967	0.330388	0.310037	0.558942	0.606722
0.184034	0.36874	0.353026	0.5582	0.561084
0.258578	0.453405	0.485665	0.508599	0.533323
0.250478	0.442343	0.334408	0.546132	0.458098
0.35249	0.428409	0.246452	0.556172	0.500767
0.192304	0.293552	0.24916	0.574709	0.612588
0.194855	0.382905	0.336967	0.559875	0.553455
0.276961	0.428939	0.233216	0.566413	0.453362
0.229899	0.380185	0.250062	0.559046	0.510649
0.182533	0.366623	0.241095	0.587709	0.539663
0.291646	0.517184	0.206314	0.524391	0.332934
0.205933	0.264787	0.222417	0.569675	0.660899
0.253254	0.317462	0.237784	0.580926	0.645725
0.329658	0.394604	0.237686	0.579526	0.524172
0.505683	0.62952	0.186426	0.400933	0.382708
0.30657	0.482711	0.198802	0.57312	0.375702
0.359607	0.46946	0.240693	0.546637	0.432583
0.362197	0.419321	0.215063	0.555596	0.467731
0.716504	0.630152	0.214325	0.256243	0.423299
0.301981	0.603284	0.326115	0.567009	0.256646
0.28107	0.580039	0.21665	0.557913	0.285197
0.311488	0.525274	0.298463	0.581712	0.350647
0.418065	0.586976	0.206215	0.457401	0.328086
0.24919	0.527096	0.28057	0.570543	0.330863
0.378043	0.484191	0.245506	0.566745	0.439307
0.307603	0.466988	0.328002	0.563785	0.408266
0.310397	0.511478	0.37748	0.562649	0.394833
0.54073	0.549476	0.179842	0.310599	0.461936
0.340381	0.443536	0.19864	0.520905	0.493988
0.234733	0.351905	0.233033	0.591994	0.576763
0.600755	0.596692	0.202047	0.323532	0.347616
0.459169	0.582887	0.208227	0.426154	0.316961
0.318401	0.49133	0.252636	0.575943	0.393675
0.790741	0.691492	0.15558	0.246977	0.323474
0.619972	0.656487	0.142363	0.30816	0.293056
0.284997	0.412744	0.264903	0.57615	0.487519
0.295178	0.430932	0.235858	0.585545	0.481595
0.283228	0.456138	0.363204	0.591166	0.496213
0.291294	0.459406	0.349902	0.552048	0.50218
0.321658	0.410193	0.400982	0.549029	0.564456
0.284251	0.281652	0.268343	0.573904	0.667155
0.279089	0.307988	0.302819	0.570161	0.634935
0.277284	0.29452	0.308379	0.568031	0.659229
0.264117	0.302902	0.311899	0.567065	0.644605
0.293702	0.282374	0.231384	0.566936	0.682133
0.305133	0.282788	0.250404	0.561668	0.669127
0.268663	0.299636	0.287205	0.562154	0.671006
0.294444	0.284342	0.254614	0.568216	0.68528
0.260458	0.231734	0.224095	0.565239	0.699837
0.268734	0.264144	0.252611	0.565152	0.70014
0.278532	0.292514	0.26542	0.565807	0.661019
0.30219	0.310171	0.278996	0.569629	0.64235
0.225468	0.296755	0.275382	0.572652	0.645615
0.265141	0.262047	0.260644	0.570801	0.67664
0.219673	0.247933	0.247805	0.564956	0.694437
0.201486	0.203349	0.229947	0.570455	0.747102
0.237885	0.224764	0.214871	0.571849	0.722437
0.205363	0.189022	0.210132	0.580052	0.758106
0.207693	0.178527	0.201959	0.580932	0.773645
0.207989	0.193709	0.205926	0.575376	0.747873
0.197241	0.195425	0.197772	0.577631	0.733715
0.237972	0.190793	0.198705	0.579012	0.762951
0.168386	0.174145	0.210228	0.587676	0.76828
0.17202	0.15759	0.205916	0.588569	0.786812
0.285055	0.387437	0.521603	0.490806	0.670872
0.20117	0.267739	0.363756	0.556586	0.717157
0.175684	0.15529	0.222816	0.585473	0.803825
0.148568	0.14799	0.225418	0.595716	0.798578
0.184099	0.187502	0.214982	0.576031	0.754274
0.168417	0.166257	0.232156	0.589721	0.782828
0.168848	0.164578	0.229384	0.588038	0.782856
0.182252	0.188468	0.227404	0.572254	0.759996
0.184571	0.20964	0.22594	0.569882	0.726461
0.181159	0.219379	0.227646	0.568248	0.71106
0.188992	0.23146	0.228312	0.564417	0.696749
0.187887	0.227649	0.2264	0.564993	0.703483
0.207154	0.233509	0.224551	0.564661	0.702672
0.181266	0.21928	0.234159	0.570857	0.721048
0.170387	0.214191	0.233925	0.579325	0.714937
0.172148	0.218511	0.236886	0.58023	0.703522
0.175962	0.255643	0.278028	0.566784	0.67772
0.188575	0.283821	0.288771	0.570872	0.640097
0.205212	0.298286	0.293008	0.568102	0.629005
0.191149	0.328962	0.346512	0.556345	0.608256
0.203216	0.371777	0.425437	0.554566	0.544338
0.213659	0.350297	0.283081	0.561076	0.560542
0.201061	0.353001	0.323603	0.55473	0.604179
0.20347	0.417649	0.413222	0.535928	0.526483
0.18293	0.405029	0.337246	0.557861	0.49658
0.297905	0.469124	0.318113	0.525515	0.398819
0.649121	0.659671	0.109319	0.253436	0.318066
0.398613	0.486011	0.194645	0.528525	0.421362
0.422412	0.467054	0.196258	0.59099	0.476909
0.202579	0.436375	0.243905	0.586764	0.413383
0.28768	0.369225	0.25144	0.571291	0.504693
0.23698	0.352618	0.237327	0.603429	0.565186
0.280815	0.417023	0.252912	0.575934	0.449694
0.591113	0.65341	0.132598	0.32379	0.298912
0.250158	0.509064	0.274823	0.574776	0.356884
0.29301	0.44345	0.397938	0.549721	0.521843
0.284451	0.336134	0.255661	0.56367	0.627737
0.311556	0.598313	0.245453	0.525668	0.230356
0.309338	0.665202	0.490327	0.520849	0.229163
0.583184	0.67854	0.188825	0.33015	0.243908
0.276931	0.43151	0.261079	0.582465	0.431554
0.366427	0.568933	0.273969	0.530986	0.301247
0.297622	0.58376	0.314073	0.561479	0.255647
0.303916	0.562749	0.280658	0.587063	0.273854
0.319269	0.540332	0.283408	0.579269	0.305949
0.349849	0.593354	0.232024	0.552794	0.251115
0.329727	0.507287	0.266846	0.574827	0.29444
0.408956	0.582132	0.203285	0.45489	0.320723
0.529184	0.591387	0.145526	0.366818	0.327983
0.295133	0.593719	0.431398	0.542284	0.311534
0.360886	0.549688	0.256826	0.574723	0.327832
0.285169	0.526396	0.369363	0.552753	0.370663
0.301861	0.489648	0.366245	0.550991	0.520099
0.329892	0.559554	0.404286	0.546229	0.373968
0.393319	0.554999	0.221928	0.488422	0.338599
0.312461	0.525643	0.212084	0.558182	0.27911
0.314384	0.449951	0.472128	0.542409	0.533008
0.322734	0.451548	0.531138	0.517871	0.548664
0.290861	0.442791	0.426804	0.543071	0.52328
0.274485	0.34736	0.35201	0.571515	0.629243
0.223433	0.357462	0.318644	0.56558	0.571519
0.267922	0.330953	0.305271	0.562009	0.647554
0.295606	0.271252	0.254974	0.573925	0.688769
0.259369	0.272318	0.255676	0.57131	0.695155
0.243611	0.229777	0.222051	0.573135	0.722997
0.258746	0.294986	0.284108	0.560423	0.665251
0.217273	0.24116	0.243999	0.566144	0.692065
0.269567	0.286954	0.261194	0.560746	0.6649
0.251157	0.241659	0.234564	0.565965	0.697165
0.262623	0.239291	0.225926	0.576315	0.709076
0.213264	0.23019	0.243952	0.573547	0.708448
0.202825	0.221806	0.248928	0.569964	0.731106
0.231871	0.230319	0.235799	0.571579	0.715378
0.187452	0.182056	0.224604	0.575949	0.761568
0.213132	0.197166	0.215076	0.57061	0.756577
0.185005	0.197706	0.226144	0.576357	0.745786
0.178942	0.174384	0.218966	0.581492	0.771795
0.205902	0.181974	0.208086	0.577544	0.767925
0.204888	0.172432	0.204588	0.576914	0.78158
0.201792	0.162615	0.203255	0.580936	0.791033
0.193544	0.173297	0.196809	0.579164	0.768154
0.185056	0.169358	0.195386	0.582017	0.766642
0.182442	0.16291	0.199998	0.58935	0.776403
0.184525	0.166886	0.199112	0.586194	0.775892
0.170248	0.175382	0.205913	0.582732	0.766541
0.185119	0.196674	0.214238	0.577081	0.737248
0.197308	0.220901	0.247537	0.561569	0.747715
0.15976	0.162051	0.220785	0.591669	0.787094
0.249087	0.210752	0.217387	0.563238	0.755669
0.178462	0.185421	0.222794	0.57426	0.763376
0.179703	0.152842	0.222249	0.597179	0.801131
0.191658	0.183842	0.2168	0.574522	0.764161
0.180391	0.178686	0.208897	0.577078	0.760144
0.184485	0.179149	0.208247	0.569075	0.759044
0.191074	0.194345	0.222515	0.573229	0.748166
0.189042	0.189805	0.220801	0.578237	0.752685
0.213352	0.208854	0.215036	0.568316	0.738657
0.180065	0.191873	0.222189	0.574754	0.748987
0.171726	0.191311	0.224628	0.575366	0.745037
0.26199	0.239082	0.232873	0.568255	0.718857
0.158637	0.184562	0.231346	0.579352	0.74305
0.154451	0.177623	0.229626	0.584837	0.756105
0.159227	0.179881	0.23947	0.572378	0.765767
0.202318	0.22826	0.274756	0.557839	0.725246
0.181177	0.226194	0.26352	0.579181	0.703009
0.157297	0.224401	0.274686	0.568658	0.715644
0.181118	0.262626	0.30884	0.563909	0.67596
0.206312	0.34836	0.36688	0.537531	0.580918
0.206703	0.374435	0.371027	0.543227	0.583235
0.486081	0.5384	0.198002	0.409561	0.401186
0.289909	0.463092	0.189883	0.58571	0.405298
0.244906	0.381559	0.30379	0.557723	0.48778
0.339607	0.517017	0.188848	0.566652	0.355868
0.228714	0.405956	0.264397	0.573076	0.452163
0.230963	0.293962	0.234868	0.591927	0.593645
0.247844	0.347049	0.249714	0.591921	0.565632
0.498178	0.567389	0.170139	0.391072	0.354178
0.339328	0.543408	0.260477	0.56679	0.33793
0.253614	0.423326	0.403969	0.57695	0.480728
0.410306	0.471688	0.234383	0.476293	0.449375
0.28329	0.576447	0.255733	0.57713	0.283361
0.351839	0.586762	0.217325	0.509374	0.313021
0.275259	0.43588	0.399955	0.54668	0.498701
0.369328	0.610783	0.233859	0.518419	0.259157
0.286513	0.490812	0.292334	0.576443	0.416188
0.236444	0.474398	0.326333	0.563286	0.4
0.293468	0.573389	0.292269	0.58975	0.271775
0.329614	0.663246	0.429509	0.534909	0.224032
0.290609	0.577837	0.267341	0.571006	0.253616
0.380477	0.587541	0.288976	0.549166	0.281473
0.265409	0.578088	0.283147	0.569698	0.272579
0.555047	0.714851	0.214446	0.319604	0.239831
0.331236	0.604607	0.324085	0.568447	0.24205
0.320172	0.628132	0.351393	0.554615	0.23541
0.338548	0.578444	0.258638	0.572273	0.276838
0.343955	0.499857	0.23035	0.553251	0.389599
0.268807	0.313586	0.320431	0.570751	0.638664
0.317669	0.380085	0.40586	0.541819	0.613015
0.273631	0.383057	0.36484	0.566597	0.58966
0.300532	0.384367	0.473339	0.542839	0.636049
0.307802	0.444726	0.484184	0.522804	0.549742
0.298109	0.354199	0.383541	0.564354	0.62894
0.284473	0.369316	0.335117	0.562385	0.585976
0.276665	0.300388	0.289899	0.564633	0.641626
0.23611	0.292526	0.266156	0.567955	0.647878
0.282245	0.298678	0.269884	0.569042	0.639407
0.312016	0.316791	0.246074	0.569426	0.637491
0.256479	0.239716	0.244151	0.576546	0.718344
0.234067	0.26868	0.231561	0.564153	0.672922
0.224189	0.245065	0.221366	0.569168	0.697648
0.237083	0.256855	0.231643	0.562988	0.68967
0.224586	0.247323	0.240391	0.568609	0.709092
0.207116	0.203393	0.22486	0.566609	0.74883
0.201828	0.203014	0.227273	0.567153	0.745662
0.203275	0.209656	0.234425	0.563836	0.742538
0.20515	0.200011	0.221861	0.56567	0.752175
0.183881	0.194602	0.220237	0.5716	0.745564
0.188835	0.18265	0.212559	0.578987	0.760692
0.192927	0.188859	0.209393	0.579115	0.755349
0.18846	0.184685	0.214409	0.576559	0.761578
0.188427	0.169906	0.206471	0.585515	0.776747
0.211162	0.175733	0.206061	0.578872	0.780677
0.216158	0.174377	0.20639	0.583844	0.783881
0.22209	0.173741	0.20529	0.587269	0.782799
0.179469	0.183136	0.258437	0.573299	0.779747
0.195744	0.204219	0.281487	0.560825	0.766849
0.165152	0.182346	0.268712	0.570945	0.777447
0.250165	0.309833	0.455423	0.530466	0.711114
0.319767	0.498999	0.635375	0.434802	0.578148
0.314473	0.491122	0.630242	0.448537	0.575322
0.298625	0.425075	0.541516	0.465889	0.6208
0.164034	0.14402	0.223654	0.590439	0.807301
0.295234	0.382969	0.538207	0.458844	0.699044
0.168907	0.152401	0.222157	0.595358	0.800085
0.183834	0.146238	0.2162	0.587736	0.809929
0.200672	0.185072	0.228682	0.575381	0.777687
0.176073	0.160422	0.201249	0.585054	0.784824
0.191606	0.167092	0.204833	0.580331	0.783244
0.189849	0.175971	0.212044	0.578958	0.773541
0.204296	0.193941	0.212254	0.579966	0.750973
0.203579	0.201729	0.211302	0.574363	0.740792
0.243241	0.209272	0.21206	0.567978	0.747042
0.180059	0.179957	0.216778	0.580022	0.762596
0.174824	0.18828	0.223532	0.577843	0.754435
0.228944	0.200529	0.223824	0.560137	0.761398
0.161091	0.15721	0.22168	0.586736	0.788789
0.152089	0.150632	0.230541	0.576986	0.803358
0.236856	0.1912	0.237754	0.573986	0.780516
0.199947	0.189991	0.245015	0.583406	0.768158
0.166302	0.18623	0.242383	0.584514	0.764212
0.165736	0.194888	0.250191	0.58476	0.754048
0.166385	0.226948	0.264141	0.578456	0.714779
0.190982	0.288287	0.315352	0.564317	0.665071
0.497318	0.605768	0.143956	0.396688	0.297956
0.390423	0.520275	0.174324	0.510076	0.344922
0.299864	0.39069	0.372467	0.549608	0.571797
0.376954	0.516426	0.241521	0.50189	0.423196
0.232518	0.430153	0.267648	0.584293	0.446872
0.218563	0.265049	0.253766	0.574996	0.672864
0.241652	0.255714	0.217697	0.596115	0.706806
0.185278	0.331617	0.257966	0.574925	0.58243
0.298403	0.454501	0.237669	0.560651	0.398081
0.18612	0.344663	0.287387	0.571223	0.561166
0.429872	0.448018	0.184835	0.444222	0.379244
0.448134	0.541756	0.162611	0.425009	0.393824
0.290046	0.585348	0.387841	0.515133	0.293322
0.315335	0.561608	0.638816	0.482443	0.441859
0.287772	0.553697	0.519596	0.518277	0.389053
0.304578	0.546904	0.429492	0.555812	0.363783
0.285126	0.426415	0.260126	0.575676	0.464076
0.291521	0.506036	0.296473	0.565548	0.36046
0.271223	0.549384	0.476286	0.549894	0.4
0.292257	0.481211	0.277908	0.57207	0.31774
0.297618	0.555681	0.250279	0.56972	0.306627
0.326539	0.659566	0.396648	0.560072	0.233632
0.277642	0.553432	0.252054	0.57479	0.372355
0.337678	0.622631	0.29932	0.561523	0.232204
0.263254	0.472211	0.264655	0.566376	0.373601
0.270416	0.577322	0.304116	0.560157	0.315406
0.308501	0.49064	0.295657	0.56613	0.4
0.338909	0.482989	0.318688	0.548449	0.419114
0.297501	0.488858	0.43209	0.530584	0.471376
0.323207	0.430317	0.431317	0.530692	0.534201
0.296945	0.439568	0.32724	0.560477	0.465766
0.292987	0.389952	0.33154	0.566332	0.561652
0.298326	0.319873	0.288601	0.571401	0.629141
0.316205	0.394551	0.353962	0.549133	0.566709
0.284085	0.269536	0.249502	0.569541	0.673241
0.270313	0.276591	0.261482	0.567214	0.688082
0.21486	0.230346	0.229794	0.567412	0.712126
0.19893	0.221886	0.244908	0.573709	0.727781
0.186305	0.201335	0.219251	0.572407	0.74149
0.231286	0.203317	0.218878	0.573344	0.745628
0.233367	0.207636	0.215525	0.57134	0.719347
0.211212	0.227191	0.218279	0.566222	0.717246
0.197624	0.180227	0.214877	0.579931	0.759722
0.204559	0.252013	0.261122	0.567922	0.671445
0.186778	0.181707	0.203811	0.573313	0.760746
0.206828	0.216129	0.213713	0.575952	0.724865
0.189327	0.180496	0.208703	0.576263	0.761872
0.200838	0.200126	0.209651	0.576209	0.74159
0.203209	0.187355	0.215384	0.581097	0.761874
0.19829	0.167413	0.204023	0.581346	0.783043
0.205158	0.171572	0.207105	0.587761	0.779426
0.190844	0.149891	0.211248	0.59274	0.79814
0.184508	0.136066	0.213067	0.595075	0.821757
0.214711	0.220266	0.243242	0.560865	0.733142
0.197801	0.186205	0.220518	0.572668	0.765134
0.245689	0.260086	0.386046	0.532927	0.759127
0.317155	0.41527	0.570696	0.476115	0.646825
0.263018	0.295502	0.39886	0.532039	0.720087
0.295437	0.410148	0.549638	0.472059	0.635255
0.297148	0.420884	0.550132	0.464848	0.634376
0.259598	0.301114	0.38862	0.536927	0.709902
0.284091	0.389861	0.565142	0.50698	0.682542
0.308897	0.446059	0.587444	0.459278	0.612265
0.233811	0.224907	0.349389	0.550876	0.781166
0.156467	0.142908	0.222113	0.5955	0.813749
0.179831	0.136478	0.213742	0.58876	0.823178
0.191672	0.143634	0.210305	0.586327	0.815598
0.195042	0.147957	0.20602	0.583056	0.811039
0.256889	0.178951	0.203235	0.572767	0.79616
0.194712	0.14659	0.197956	0.591759	0.811513
0.18598	0.129156	0.208054	0.595154	0.835354
0.183038	0.172092	0.217062	0.588954	0.774871
0.204611	0.178152	0.206024	0.576449	0.755018
0.216108	0.155211	0.202585	0.57729	0.807361
0.21076	0.185726	0.210837	0.570861	0.766308
0.185709	0.187702	0.217844	0.579928	0.754462
0.187227	0.195272	0.218892	0.57864	0.744285
0.164268	0.155284	0.227894	0.596015	0.793649
0.16579	0.157516	0.232275	0.594209	0.792417
0.145662	0.157392	0.230553	0.574265	0.789743
0.156235	0.148869	0.227531	0.587643	0.801864
0.160212	0.15811	0.233533	0.58534	0.791968
0.177677	0.162341	0.239378	0.59388	0.786614
0.248823	0.259607	0.304038	0.54269	0.739593
0.162548	0.191695	0.251844	0.582063	0.757344
0.357409	0.582671	0.153047	0.507721	0.278985
0.333862	0.533272	0.189341	0.571902	0.335198
0.364246	0.426475	0.29321	0.556726	0.518595
0.365907	0.477664	0.250671	0.548268	0.420809
0.284314	0.495329	0.22476	0.588172	0.329414
0.309925	0.477139	0.202032	0.593749	0.369669
0.509047	0.458999	0.239223	0.415499	0.385482
0.250536	0.44264	0.306062	0.560233	0.469824
0.204098	0.281942	0.262926	0.570315	0.634619
0.268469	0.354598	0.30841	0.557823	0.59017
0.32935	0.42104	0.238531	0.594226	0.44745
0.281831	0.489621	0.265226	0.578351	0.407037
0.253696	0.47697	0.261912	0.582413	0.420322
0.31411	0.256131	0.216484	0.599986	0.709076
0.270115	0.386686	0.242662	0.585777	0.484332
0.284835	0.45083	0.268154	0.585097	0.411149
0.221724	0.544902	0.317232	0.566678	0.283103
0.267932	0.562902	0.364554	0.560021	0.365843
0.267013	0.440246	0.312712	0.556369	0.439044
0.265101	0.490784	0.462098	0.539178	0.449723
0.283525	0.511816	0.510518	0.540054	0.436916
0.284142	0.377234	0.295302	0.570783	0.555007
0.268983	0.354932	0.280382	0.558483	0.551992
0.297765	0.517335	0.413006	0.541643	0.412049
0.33001	0.574338	0.469173	0.534265	0.393504
0.323831	0.653459	0.448764	0.53479	0.233742
0.348431	0.607962	0.434292	0.532967	0.300373
0.320494	0.484336	0.353787	0.54226	0.405439
0.31428	0.600253	0.469716	0.516938	0.333102
0.269735	0.452973	0.379212	0.548623	0.474195
0.249353	0.488014	0.342489	0.563403	0.4
0.291086	0.530831	0.41769	0.546768	0.371183
0.278301	0.492109	0.442202	0.53927	0.455386
0.274557	0.466788	0.416195	0.542451	0.484724
0.300662	0.476799	0.303003	0.570881	0.38162
0.248618	0.393097	0.335055	0.574369	0.546734
0.258389	0.333107	0.268315	0.571911	0.601582
0.234606	0.28179	0.293066	0.577728	0.652267
0.223704	0.264841	0.259067	0.577933	0.672433
0.245087	0.257974	0.242422	0.575893	0.699973
0.269904	0.285049	0.267279	0.571832	0.67133
0.197652	0.214502	0.230893	0.569878	0.733502
0.229488	0.224544	0.230582	0.570091	0.72115
0.215537	0.218532	0.230135	0.570511	0.727122
0.180245	0.20746	0.226572	0.567496	0.726904
0.204192	0.211228	0.226138	0.569079	0.730594
0.207418	0.202514	0.218148	0.565832	0.748422
0.191161	0.192847	0.22871	0.569262	0.756342
0.187185	0.176076	0.201687	0.584929	0.762351
0.223943	0.223306	0.211645	0.564883	0.728207
0.350384	0.494132	0.606129	0.443269	0.565244
0.307515	0.430637	0.53754	0.448613	0.600308
0.312584	0.361711	0.277685	0.521286	0.593453
0.354674	0.519461	0.648003	0.441175	0.557086
0.332201	0.486506	0.592766	0.461807	0.562224
0.203652	0.214441	0.227766	0.569499	0.733288
0.247755	0.317674	0.383731	0.550787	0.692856
0.322792	0.366552	0.518173	0.465106	0.677635
0.21274	0.213894	0.289434	0.567244	0.767067
0.195365	0.24052	0.343472	0.570172	0.748683
0.352613	0.47881	0.631231	0.420738	0.616397
0.340708	0.481474	0.62711	0.435884	0.605223
0.299188	0.421799	0.603605	0.486408	0.653292
0.348949	0.482684	0.626409	0.438486	0.601181
0.258881	0.302311	0.451611	0.529483	0.731612
0.222651	0.239231	0.321984	0.55562	0.75399
0.215989	0.255711	0.325024	0.563153	0.724453
0.173067	0.142807	0.231713	0.580234	0.825573
0.209915	0.193242	0.293911	0.567549	0.79867
0.207814	0.201507	0.265576	0.560833	0.769574
0.155122	0.132725	0.226782	0.596498	0.818663
0.151936	0.137317	0.225768	0.595024	0.81339
0.166752	0.144546	0.216821	0.592498	0.805177
0.178796	0.154101	0.209216	0.589332	0.794101
0.190517	0.157095	0.203395	0.589658	0.802777
0.182287	0.128008	0.207095	0.591122	0.831841
0.211096	0.116041	0.203199	0.584106	0.854899
0.199529	0.117885	0.212814	0.591506	0.859363
0.224473	0.15175	0.212016	0.577215	0.839166
0.333007	0.432975	0.505207	0.46383	0.613662
0.248809	0.276	0.324057	0.516602	0.702734
0.20487	0.140683	0.203495	0.582376	0.827679
0.254753	0.193178	0.217722	0.561075	0.765251
0.192043	0.176814	0.218732	0.581386	0.785583
0.174557	0.156842	0.223325	0.590784	0.790257
0.169964	0.168787	0.230693	0.590427	0.778596
0.165008	0.156747	0.228579	0.583833	0.793417
0.209037	0.163077	0.228758	0.577709	0.801382
0.177111	0.152384	0.214779	0.587492	0.800662
0.19586	0.153572	0.229561	0.601201	0.80772
0.205351	0.188237	0.233815	0.589764	0.774095
0.1714	0.175036	0.231123	0.586908	0.772356
0.323694	0.334272	0.127305	0.308474	0.130544
0.254968	0.471641	0.322187	0.567262	0.412036
0.223424	0.435968	0.315936	0.556614	0.458801
0.258647	0.440512	0.289532	0.555719	0.491863
0.292589	0.36932	0.261572	0.545062	0.546497
0.237698	0.335728	0.26831	0.575597	0.552863
0.265784	0.330643	0.251951	0.61368	0.561302
0.260363	0.393726	0.271916	0.56868	0.522025
0.315845	0.5076	0.188966	0.556118	0.32894
0.195563	0.456936	0.314638	0.569916	0.384365
0.27653	0.301778	0.277609	0.58766	0.620823
0.238465	0.430233	0.333551	0.567621	0.504205
0.364121	0.494181	0.206644	0.569985	0.389759
0.292357	0.438233	0.25972	0.576148	0.425871
0.230599	0.484086	0.273117	0.584637	0.337156
0.247084	0.288479	0.215185	0.619242	0.654793
0.26955	0.420437	0.267628	0.564364	0.486036
0.325752	0.490701	0.358444	0.569476	0.427866
0.242335	0.45291	0.308513	0.572357	0.403014
0.291276	0.410872	0.311205	0.556951	0.541488
0.297132	0.506988	0.357586	0.547194	0.378832
0.307821	0.523417	0.529775	0.530725	0.453215
0.272812	0.356947	0.240862	0.569446	0.563808
0.335089	0.50431	0.425451	0.528532	0.449701
0.27589	0.488549	0.481759	0.53084	0.478375
0.243396	0.351002	0.363639	0.558329	0.608141
0.242133	0.351878	0.348401	0.552239	0.604287
0.273003	0.368033	0.366283	0.558666	0.598677
0.24229	0.368608	0.372044	0.558713	0.59619
0.229023	0.315435	0.348192	0.565626	0.635153
0.280147	0.372527	0.346839	0.569078	0.584894
0.265574	0.365975	0.370383	0.563745	0.587945
0.246663	0.318308	0.281783	0.570867	0.625795
0.259995	0.343085	0.26184	0.567921	0.582631
0.259768	0.333956	0.284049	0.571902	0.610819
0.178261	0.238293	0.2461	0.566623	0.694033
0.18968	0.239279	0.248435	0.575559	0.695187
0.191469	0.227844	0.246211	0.57653	0.709353
0.329011	0.48153	0.625246	0.453578	0.606097
0.182335	0.201525	0.228158	0.578529	0.735929
0.184148	0.184044	0.229677	0.578063	0.762282
0.202946	0.18162	0.225117	0.571744	0.769351
0.218765	0.178597	0.227791	0.575453	0.781952
0.213197	0.20557	0.223243	0.574884	0.746746
0.206075	0.193039	0.218212	0.576092	0.764527
0.19675	0.187175	0.222079	0.572992	0.762486
0.188369	0.200998	0.227313	0.577099	0.740991
0.207171	0.218032	0.229571	0.574973	0.72648
0.197188	0.187328	0.217566	0.572299	0.760828
0.206553	0.175573	0.211943	0.581237	0.780239
0.222364	0.188379	0.227025	0.559168	0.773468
0.326297	0.406653	0.435347	0.475105	0.600577
0.360241	0.525299	0.64176	0.426597	0.552502
0.327221	0.460031	0.54776	0.49476	0.575027
0.271484	0.387563	0.452018	0.528309	0.623813
0.274339	0.265754	0.294818	0.526251	0.709143
0.338548	0.464891	0.55376	0.471417	0.587993
0.299587	0.444848	0.543595	0.498924	0.586583
0.28362	0.389142	0.492331	0.515453	0.635706
0.194421	0.185549	0.285448	0.572193	0.794543
0.173783	0.147476	0.227318	0.573856	0.816557
0.161805	0.141186	0.218657	0.57533	0.817227
0.170348	0.136967	0.221956	0.578545	0.828807
0.167739	0.140152	0.225152	0.576648	0.821791
0.173066	0.148131	0.232467	0.574266	0.818368
0.20663	0.178749	0.283622	0.557309	0.811769
0.214728	0.192811	0.299106	0.558861	0.800605
0.1578	0.138468	0.241815	0.580005	0.837611
0.1629	0.121064	0.245666	0.580041	0.852489
0.159973	0.109053	0.226134	0.586722	0.86072
0.257774	0.244392	0.305447	0.552076	0.750098
0.17361	0.122688	0.228204	0.587846	0.848304
0.143498	0.114876	0.225793	0.586403	0.846381
0.159764	0.119004	0.216652	0.592301	0.839391
0.211941	0.129313	0.219736	0.587201	0.843813
0.176942	0.131919	0.210943	0.589956	0.835101
0.185356	0.120863	0.20557	0.586089	0.846579
0.183663	0.140076	0.234826	0.583984	0.829513
0.17647	0.137204	0.236761	0.577602	0.831142
0.212386	0.169839	0.283852	0.566056	0.825804
0.250859	0.254708	0.340714	0.549593	0.752191
0.252163	0.273399	0.361506	0.544537	0.733115
0.215981	0.228896	0.248067	0.575234	0.718827
0.201051	0.148548	0.230827	0.574428	0.825213
0.199639	0.201738	0.264554	0.586591	0.768733
0.189707	0.136017	0.213365	0.591032	0.82728
0.169193	0.141513	0.217168	0.587444	0.81412
0.175761	0.154473	0.223831	0.585834	0.800925
0.18125	0.135754	0.212754	0.59022	0.829172
0.175933	0.158344	0.218385	0.582131	0.793452
0.23761	0.169099	0.21548	0.57884	0.80012
0.196683	0.153959	0.220213	0.595868	0.80263
0.200212	0.168798	0.22518	0.588177	0.791122
0.173424	0.159789	0.217574	0.588406	0.787285
0.213999	0.126927	0.0609305	0.0893732	0.108336
0.610742	0.341366	0.0600274	0.175357	0.145117
0.254497	0.48046	0.321521	0.556296	0.405454
0.264132	0.479432	0.34403	0.556747	0.409389
0.206264	0.393994	0.286855	0.586025	0.470211
0.282526	0.485364	0.242329	0.581243	0.374335
0.153278	0.48032	0.264058	0.58591	0.339772
0.201632	0.28679	0.271277	0.565535	0.593598
0.311331	0.296109	0.29131	0.554168	0.650484
0.212975	0.36679	0.243962	0.569665	0.534309
0.282067	0.564324	0.241545	0.568179	0.245072
0.245792	0.460114	0.274685	0.572682	0.394211
0.309215	0.458916	0.331236	0.574453	0.445441
0.250044	0.357255	0.257424	0.604574	0.565861
0.336139	0.348019	0.273151	0.548366	0.618182
0.256877	0.410208	0.320734	0.554135	0.516375
0.217463	0.412961	0.362181	0.583721	0.495086
0.303871	0.478664	0.469468	0.53125	0.473221
0.276729	0.590253	0.242992	0.565518	0.228823
0.260285	0.594874	0.415375	0.543531	0.300128
0.295386	0.398875	0.379366	0.555812	0.543
0.242226	0.355505	0.330217	0.575144	0.547485
0.236303	0.365713	0.349322	0.557371	0.594366
0.265386	0.345523	0.370238	0.568898	0.65051
0.235135	0.340963	0.343848	0.564656	0.62308
0.215452	0.312224	0.364528	0.567999	0.641579
0.240881	0.314975	0.297145	0.563022	0.626017
0.226388	0.311133	0.284395	0.562832	0.622363
0.218448	0.243979	0.298037	0.567626	0.720153
0.198228	0.227016	0.29547	0.571641	0.732955
0.208212	0.214628	0.258503	0.570114	0.734252
0.314725	0.366268	0.435152	0.475655	0.649395
0.23332	0.244084	0.25751	0.554834	0.714551
0.239694	0.271434	0.359829	0.543329	0.736004
0.167233	0.175877	0.236549	0.58007	0.772159
0.173791	0.181817	0.229587	0.582691	0.759399
0.182198	0.170959	0.223058	0.586437	0.776739
0.205149	0.202425	0.217119	0.575621	0.744634
0.279661	0.331148	0.319758	0.514943	0.643643
0.220156	0.170329	0.206522	0.580076	0.787694
0.204921	0.170542	0.209503	0.581738	0.789716
0.201821	0.187297	0.209642	0.582755	0.758634
0.189933	0.177462	0.209829	0.590401	0.764686
0.199768	0.193058	0.223317	0.581885	0.749666
0.200723	0.177661	0.217193	0.574567	0.77385
0.181366	0.187885	0.242505	0.577545	0.762619
0.22069	0.206099	0.24062	0.565379	0.751856
0.222009	0.192566	0.260396	0.565809	0.785666
0.323233	0.50142	0.623248	0.438446	0.572618
0.345318	0.494122	0.585066	0.469575	0.563914
0.339707	0.452541	0.512597	0.469072	0.58016
0.278163	0.343764	0.393112	0.529272	0.646985
0.236841	0.165576	0.207126	0.561899	0.802466
0.275175	0.284978	0.405639	0.475999	0.7388
0.211719	0.164659	0.220855	0.584787	0.812919
0.21308	0.181585	0.295408	0.564831	0.79153
0.251856	0.242155	0.329165	0.553852	0.760641
0.167942	0.139228	0.227114	0.582186	0.821225
0.155168	0.131993	0.212437	0.582226	0.816189
0.153303	0.130558	0.210929	0.582405	0.8217
0.167887	0.127413	0.211254	0.582711	0.829692
0.164551	0.135298	0.216983	0.579275	0.822807
0.16394	0.137422	0.216895	0.578523	0.819921
0.168319	0.143077	0.224499	0.578869	0.814663
0.169019	0.1505	0.231946	0.581136	0.808508
0.156687	0.135813	0.213809	0.588805	0.815029
0.158853	0.113476	0.223449	0.584046	0.852748
0.153455	0.116864	0.220938	0.584386	0.848269
0.152146	0.117081	0.227312	0.595579	0.845469
0.152802	0.117067	0.223275	0.599003	0.841536
0.156187	0.170317	0.227634	0.594906	0.778223
0.16049	0.135828	0.224118	0.592522	0.816995
0.165679	0.121508	0.22311	0.594093	0.838881
0.153263	0.145065	0.214476	0.583406	0.807356
0.165141	0.124403	0.217543	0.585614	0.836477
0.174899	0.123562	0.225068	0.589578	0.844755
0.163295	0.122325	0.227094	0.58641	0.844134
0.16164	0.130424	0.236381	0.584951	0.836533
0.166084	0.128248	0.234737	0.584533	0.837702
0.211092	0.151558	0.243914	0.576379	0.831775
0.285207	0.320442	0.329768	0.52604	0.661247
0.236878	0.208875	0.28365	0.54176	0.769237
0.209665	0.155588	0.270265	0.566503	0.827736
0.209552	0.120502	0.209725	0.587193	0.857417
0.201878	0.127959	0.211491	0.589248	0.845393
0.201566	0.142664	0.216551	0.574096	0.825549
0.182382	0.136558	0.215203	0.592704	0.824671
0.200055	0.146721	0.210823	0.588278	0.815295
0.215273	0.138536	0.209943	0.590205	0.83181
0.224936	0.156086	0.210733	0.572638	0.816597
0.18435	0.16246	0.200462	0.586372	0.782553
0.180309	0.159562	0.206925	0.588382	0.787885
0.240827	0.433568	0.294181	0.5825	0.436412
0.303167	0.50874	0.253447	0.558943	0.434559
0.203199	0.273528	0.226997	0.569586	0.658361
0.287319	0.32007	0.232046	0.562708	0.619499
0.340309	0.524963	0.204298	0.574165	0.335465
0.183189	0.405974	0.3279	0.577115	0.516607
0.286526	0.378601	0.275256	0.584154	0.525262
0.223322	0.240797	0.232951	0.604201	0.700545
0.258333	0.262157	0.233877	0.54813	0.693379
0.276694	0.401123	0.300656	0.572327	0.50202
0.285759	0.32163	0.243129	0.577049	0.61738
0.282697	0.376855	0.296564	0.552477	0.578763
0.290308	0.466912	0.320311	0.585353	0.465576
0.25599	0.529125	0.291577	0.568743	0.33473
0.344222	0.534251	0.5472	0.494388	0.489996
0.278855	0.438374	0.496253	0.549429	0.518738
0.251544	0.287311	0.308807	0.572107	0.62171
0.225362	0.274996	0.26635	0.568011	0.688182
0.243186	0.329203	0.313089	0.563475	0.626625
0.196614	0.271478	0.266219	0.569206	0.682265
0.215415	0.246536	0.266996	0.564883	0.714079
0.234781	0.263049	0.278546	0.554543	0.687306
0.238542	0.248714	0.279334	0.557147	0.72515
0.197562	0.218815	0.246343	0.578764	0.712049
0.212976	0.231617	0.266863	0.569256	0.723121
0.178768	0.205075	0.244936	0.57973	0.733501
0.177817	0.198474	0.240819	0.574662	0.742046
0.337537	0.488671	0.628435	0.446158	0.611317
0.1988	0.238486	0.280598	0.570225	0.735381
0.173565	0.162204	0.222011	0.580999	0.786883
0.210322	0.187218	0.225006	0.575517	0.770836
0.218151	0.181173	0.222141	0.572303	0.781354
0.201706	0.178783	0.217772	0.580495	0.779056
0.21105	0.244941	0.288758	0.557124	0.734833
0.18933	0.179989	0.204967	0.581742	0.759058
0.203472	0.210294	0.218937	0.565684	0.748452
0.252832	0.32244	0.428076	0.522912	0.732382
0.221827	0.208624	0.234515	0.548751	0.742701
0.17532	0.164247	0.213694	0.589029	0.776392
0.180962	0.157124	0.217893	0.587693	0.792788
0.23368	0.2323	0.293668	0.56034	0.742489
0.279362	0.308407	0.401072	0.537778	0.689309
0.275052	0.251553	0.258686	0.54608	0.731918
0.337734	0.476552	0.593456	0.458049	0.580297
0.328497	0.47083	0.598489	0.46538	0.592825
0.351199	0.50011	0.624195	0.458539	0.571476
0.219076	0.217422	0.238565	0.577145	0.765621
0.286844	0.354099	0.387106	0.479746	0.665459
0.213806	0.138782	0.198686	0.584543	0.828864
0.215206	0.137844	0.216067	0.577314	0.837039
0.18212	0.144982	0.229019	0.572913	0.820562
0.185862	0.153885	0.265288	0.576771	0.828886
0.18731	0.149954	0.246786	0.575379	0.826774
0.161307	0.122702	0.217843	0.586527	0.838136
0.152183	0.118796	0.205925	0.590967	0.834179
0.15406	0.125419	0.212838	0.591603	0.82846
0.15598	0.13502	0.219815	0.587262	0.818867
0.155193	0.134966	0.2103	0.586545	0.815964
0.160147	0.143507	0.230933	0.585442	0.811206
0.159927	0.11605	0.215445	0.587398	0.849867
0.155608	0.108882	0.210229	0.587401	0.854562
0.159291	0.101591	0.206948	0.594983	0.861724
0.191506	0.21254	0.310638	0.567274	0.735453
0.172201	0.140411	0.2241	0.593311	0.821328
0.160398	0.162066	0.226043	0.593123	0.781709
0.163147	0.160203	0.227691	0.593112	0.788704
0.152945	0.150585	0.227133	0.595821	0.791778
0.157776	0.157636	0.222559	0.58989	0.792384
0.154012	0.149699	0.226615	0.59908	0.79326
0.158455	0.146687	0.222423	0.599112	0.80026
0.156494	0.146229	0.225928	0.595054	0.801806
0.161682	0.157492	0.22357	0.582168	0.798071
0.161796	0.120614	0.226217	0.595422	0.843283
0.171117	0.124508	0.230662	0.592818	0.838124
0.18536	0.127541	0.226352	0.590398	0.844849
0.219635	0.206245	0.267444	0.557322	0.740814
0.223589	0.174594	0.285982	0.563444	0.815165
0.189269	0.110826	0.225689	0.587071	0.868984
0.209225	0.105485	0.215326	0.585954	0.881283
0.251723	0.129222	0.216169	0.574042	0.860625
0.163573	0.119169	0.249795	0.578976	0.857543
0.222144	0.133546	0.239651	0.581471	0.851282
0.240945	0.136706	0.208137	0.58243	0.837582
0.225585	0.144319	0.207847	0.585976	0.827869
0.222902	0.150201	0.205763	0.583325	0.817102
0.232734	0.158498	0.200118	0.579238	0.815037
0.184533	0.136935	0.202968	0.582801	0.823236
0.288858	0.468803	0.18391	0.549365	0.4
0.243965	0.369822	0.307776	0.550569	0.49659
0.218138	0.268663	0.244357	0.569836	0.65209
0.235573	0.393589	0.26178	0.581882	0.504751
0.299864	0.427903	0.227154	0.610938	0.413398
0.321879	0.473659	0.290555	0.616329	0.439372
0.243956	0.443857	0.38915	0.566184	0.456507
0.226869	0.2973	0.258158	0.572016	0.632791
0.333577	0.456773	0.312061	0.561461	0.402898
0.261365	0.378134	0.297577	0.579825	0.518
0.294059	0.369149	0.288002	0.570313	0.586129
0.270591	0.393988	0.330188	0.567094	0.540163
0.318381	0.524913	0.286088	0.567013	0.331359
0.330677	0.527933	0.485378	0.484895	0.456686
0.271483	0.440934	0.550667	0.526302	0.578563
0.237692	0.28586	0.325621	0.555994	0.67711
0.209662	0.245344	0.285436	0.570016	0.705258
0.222211	0.224536	0.277882	0.568032	0.741808
0.257945	0.287969	0.302901	0.565596	0.673704
0.209257	0.266497	0.308428	0.56573	0.687932
0.173717	0.20528	0.253241	0.572015	0.742365
0.200006	0.236736	0.243109	0.570695	0.703925
0.333796	0.51412	0.68604	0.450966	0.580535
0.202062	0.170035	0.246541	0.582963	0.797811
0.230829	0.194435	0.250105	0.574186	0.769782
0.180297	0.168646	0.240493	0.58498	0.787357
0.260858	0.249421	0.277718	0.524708	0.717971
0.189798	0.17625	0.217664	0.580575	0.771868
0.189838	0.175979	0.227277	0.576368	0.777556
0.287356	0.311398	0.327135	0.530267	0.703698
0.193985	0.171141	0.217576	0.58534	0.78269
0.193928	0.178606	0.209073	0.576569	0.769191
0.176784	0.169721	0.211597	0.579108	0.775394
0.224957	0.208473	0.212061	0.559788	0.741266
0.199588	0.218993	0.219529	0.578699	0.722634
0.186168	0.21347	0.234204	0.572405	0.717892
0.191044	0.168728	0.248754	0.575282	0.799852
0.176332	0.143218	0.232108	0.580496	0.821424
0.176294	0.142417	0.222986	0.587687	0.815013
0.190904	0.153091	0.228281	0.581095	0.808581
0.202941	0.168094	0.235041	0.590462	0.796442
0.287375	0.241448	0.295374	0.553498	0.746915
0.21353	0.222419	0.293798	0.570966	0.756247
0.304921	0.369792	0.437317	0.521675	0.647405
0.250973	0.261835	0.352961	0.547511	0.742436
0.264751	0.344465	0.486812	0.525439	0.683638
0.331041	0.371258	0.3833	0.5227	0.638349
0.296366	0.255844	0.340355	0.504936	0.759528
0.220864	0.163371	0.219019	0.566184	0.811039
0.201403	0.139598	0.211782	0.575005	0.830693
0.175231	0.13769	0.227452	0.579126	0.830939
0.177511	0.138809	0.232737	0.579726	0.828896
0.214435	0.157891	0.260739	0.571163	0.835395
0.158281	0.122838	0.218524	0.587803	0.837543
0.161375	0.127137	0.210595	0.58878	0.828625
0.152577	0.126674	0.213053	0.592771	0.825217
0.15046	0.12981	0.214578	0.58894	0.820907
0.154503	0.132666	0.211832	0.588624	0.817902
0.158247	0.125357	0.216663	0.584485	0.833744
0.165482	0.14029	0.216535	0.590233	0.812485
0.173079	0.106823	0.210705	0.592533	0.862027
0.205769	0.156636	0.255169	0.570028	0.827581
0.16401	0.135445	0.221961	0.5951	0.818966
0.16857	0.150219	0.223567	0.594893	0.799784
0.16439	0.155465	0.224693	0.59365	0.79342
0.198366	0.158954	0.224568	0.589416	0.798494
0.155433	0.146953	0.223162	0.594948	0.800661
0.16753	0.149531	0.223995	0.593081	0.80323
0.182749	0.145766	0.220678	0.595116	0.812191
0.167673	0.145092	0.222855	0.589169	0.808164
0.150511	0.14476	0.221036	0.594871	0.801639
0.148503	0.146086	0.225705	0.594243	0.800963
0.202141	0.127182	0.223859	0.58704	0.843568
0.17378	0.113376	0.22519	0.589139	0.85875
0.206998	0.122407	0.218773	0.576156	0.859036
0.208326	0.214977	0.283979	0.571046	0.736536
0.194866	0.1267	0.218444	0.588413	0.839863
0.184705	0.107969	0.214008	0.586464	0.867734
0.208662	0.106849	0.210566	0.588008	0.877307
0.227771	0.141892	0.225521	0.573954	0.841449
0.184477	0.109527	0.235495	0.575998	0.874322
0.194179	0.11775	0.245705	0.567748	0.874152
0.20075	0.133334	0.239238	0.566161	0.851119
0.251905	0.137783	0.200659	0.581796	0.840194
0.25287	0.144565	0.198788	0.583311	0.836304
0.248929	0.154975	0.206687	0.579407	0.821345
0.191143	0.148507	0.208575	0.580386	0.8103
0.186893	0.473106	0.282586	0.590749	0.351603
0.323592	0.44227	0.269463	0.58079	0.464274
0.293313	0.432851	0.237171	0.58471	0.456095
0.207906	0.307142	0.303735	0.560419	0.666857
0.24629	0.54189	0.31309	0.554614	0.315965
0.243748	0.52961	0.484953	0.543021	0.356597
0.219622	0.358891	0.29366	0.572726	0.550899
0.18669	0.347831	0.284797	0.567899	0.573445
0.258999	0.491412	0.270197	0.573317	0.360515
0.261471	0.495452	0.263038	0.574155	0.356676
0.310494	0.555407	0.406601	0.544185	0.336942
0.262454	0.35946	0.304968	0.575884	0.545337
0.281151	0.341974	0.25204	0.583136	0.594379
0.329655	0.518006	0.275444	0.561152	0.347614
0.31454	0.477629	0.502413	0.497614	0.528502
0.268852	0.334207	0.396319	0.523718	0.65823
0.279357	0.28975	0.311984	0.560943	0.686526
0.245878	0.316637	0.298933	0.565347	0.625749
0.23693	0.229208	0.296984	0.568174	0.740399
0.20854	0.224507	0.231235	0.571598	0.716161
0.204618	0.230275	0.242566	0.564497	0.711607
0.188438	0.181059	0.23089	0.570416	0.768074
0.205632	0.175481	0.22291	0.56986	0.787992
0.195577	0.240124	0.31297	0.568621	0.749771
0.178414	0.172805	0.220078	0.571197	0.775867
0.193879	0.192996	0.224998	0.572995	0.754392
0.160458	0.183551	0.225361	0.578674	0.758736
0.238233	0.22392	0.257409	0.559785	0.720345
0.207133	0.194113	0.211333	0.581727	0.75032
0.271428	0.314491	0.334787	0.513451	0.710019
0.204443	0.188323	0.21683	0.583811	0.760852
0.211169	0.232752	0.265502	0.56865	0.728665
0.290086	0.285376	0.319791	0.5023	0.687827
[truncated: 9,436 more rows]
