# Supplementary material for: Evaluation and driving factors of ecological environment quality in the Tarim River basin based on remote sensing ecological index
Source: PeerJ journal article supplement (doi:10.7717/peerj.18368), 2024-10-28
Supplement: Geodetector.xlsx [file Geodetector.xlsx]

## Sheet: Sheet1
		2000											2005
Interaction_detector										Interaction_detector
	slope	slope direction	altitude	WET	NDVI2000	NDBSI	LST	land use			WET	NDVI	NDBSI	LST	land use	slope	slope direction	altitude
slope	0.328839									WET	0.630049
slope direction	0.342924	0.00733614								NDVI	0.762767	0.581172
altitude	0.677611	0.64615	0.632973							NDBSI	0.676897	0.705243	0.570232
WET	0.687849	0.591459	0.832784	0.582166						LST	0.939282	0.941709	0.950312	0.900975
NDVI2000	0.603451	0.448749	0.817872	0.662744	0.440593					land use	0.677031	0.632298	0.61788	0.92365	0.314923
NDBSI	0.616438	0.393014	0.834935	0.605063	0.52469	0.382741				slope	0.717989	0.687844	0.717013	0.919671	0.520475	0.286299
LST	0.943637	0.940989	0.944006	0.961651	0.951024	0.957693	0.933166			slope direction	0.637374	0.587915	0.576916	0.906933	0.324415	0.299287	0.00490989
land use	0.509913	0.283375	0.745091	0.62002	0.502884	0.470538	0.940793	0.269489		altitude	0.814624	0.821159	0.853891	0.929725	0.701516	0.576761	0.537353	0.522458
Single-factor detection										Single-factor detection
	slope	slope direction	altitude	WET	NDVI2000	NDBSI	LST	land use			WET	NDVI	NDBSI	LST	land use	slope	slope direction	altitude
q statistic	0.328839	0.00733614	0.632973	0.582166	0.440593	0.382741	0.933166	0.269489		q statistic	0.630049	0.581172	0.570232	0.900975	0.314923	0.286299	0.00490989	0.522458
p value	0.000	0.000	0.000	0.000	0.000	0.000	0.000	0.000		p value	0.000	0.000	0.000	0.000	0.000	0.000	0.000	0.000
		2010											2015
Interaction_detector										Interaction_detector
	WET	NDVI	NDBSI	LST	land use	slope	slope direction	altitude			WET	NDVI	NDBSI	LST	land use	slope	slope direction	altitude
WET	0.543639									WET	0.472691
NDVI	0.71719	0.576111								NDVI	0.608829	0.283894
NDBSI	0.608902	0.664469	0.489684							NDBSI	0.477125	0.493743	0.184657
LST	0.948814	0.949419	0.960774	0.914567						LST	0.953736	0.952015	0.947539	0.923916
land use	0.619466	0.625286	0.567089	0.937349	0.28137					land use	0.553808	0.414565	0.379321	0.937659	0.254071
slope	0.671629	0.676455	0.674219	0.928834	0.532183	0.308786				slope	0.605151	0.507213	0.464933	0.935319	0.501616	0.296486
slope direction	0.553128	0.583358	0.497117	0.922169	0.292044	0.320904	0.00459402			slope direction	0.483921	0.290443	0.193122	0.929399	0.262918	0.311838	0.00590819
altitude	0.817278	0.845616	0.858577	0.937899	0.742693	0.638486	0.593837	0.581053		altitude	0.803148	0.815235	0.754808	0.937515	0.751197	0.658317	0.632019	0.618832
Single-factor detection										Single-factor detection
	WET	NDVI	NDBSI	LST	land use	slope	slope direction	altitude			WET	NDVI	NDBSI	LST	land use	slope	slope direction	altitude
q statistic	0.543639	0.576111	0.489684	0.914567	0.28137	0.308786	0.00459402	0.581053		q statistic	0.472691	0.283894	0.184657	0.923916	0.254071	0.296486	0.00590819	0.618832
p value	0.000	0.000	0.000	0.000	0.000	0.000	0.000	0.000		p value	0.000	0.000	0.000	0.000	0.000	0.000	0.000	0.000
		2020
Interaction_detector
	WET	NDVI	NDBSI	LST	land use	slope	slope direction	altitude
WET	0.592931
NDVI	0.773494	0.429099
NDBSI	0.666376	0.715062	0.556117
LST	0.926041	0.942668	0.950187	0.867899
land use	0.673161	0.564405	0.628904	0.913818	0.32695
slope	0.68621	0.615724	0.717342	0.896601	0.545086	0.265572
slope direction	0.599873	0.438525	0.562202	0.87684	0.337035	0.27819	0.00469805
altitude	0.781897	0.779131	0.822443	0.915495	0.668042	0.505011	0.440352	0.423632
Single-factor detection
	WET	NDVI	NDBSI	LST	land use	slope	slope direction	altitude
q statistic	0.592931	0.429099	0.556117	0.867899	0.32695	0.265572	0.00469805	0.423632
p value	0.000	0.000	0.000	0.000	0.000	0.000	0.000	0.000
