# Supplementary material for: Evaluation and driving factors of ecological environment quality in the Tarim River basin based on remote sensing ecological index
Source: PeerJ journal article supplement (doi:10.7717/peerj.18368), 2024-10-28
Supplement: Principal_component_analysis_results.xlsx [file Principal_component_analysis_results.xlsx]

## Sheet: Sheet2
			2000
Eigenvectors	LST	NDBSI	NDVI	WET	Eigenvalue	Percentage
PC1	0.93578	0.181375	-0.056453	-0.297037	0.035551	76.39
PC2	0.134443	0.09091	0.939896	0.300427	0.004978	87.08
PC3	0.324165	-0.471204	-0.250468	0.781121	0.004112	95.92
PC4	-0.03402	0.858374	-0.22511	0.459742	0.0019	100
			2005
Eigenvectors	LST	NDBSI	NDVI	WET	Eigenvalue	Percentage
PC1	-0.855499	-0.250108	0.257207	0.373379	0.036925	68.21
PC2	-0.219227	-0.050508	-0.965768	0.12915	0.011456	89.19
PC3	0.460402	-0.309841	0.022898	0.831567	0.005446	98.64
PC4	-0.089953	0.915911	0.024724	0.39039	0.00225	100
			2010
Eigenvectors	LST	NDBSI	NDVI	WET	Eigenvalue	Percentage
PC1	-0.904811	-0.219008	0.226098	0.286762	0.036001	65.75
PC2	-0.23769	0.05052	-0.968615	0.052313	0.012095	87.84
PC3	0.347279	-0.367254	-0.057878	0.860913	0.00448	96.03
PC4	-0.064941	0.902556	0.08553	0.416965	0.002175	100
			2015
Eigenvectors	LST	NDBSI	NDVI	WET	Eigenvalue	Percentage
PC1	0.931946	0.048477	-0.236204	-0.270802	0.038924	65.83
PC2	0.25032	0.037557	0.967121	0.024623	0.01445	90.3
PC3	-0.250928	-0.085634	0.092708	-0.959743	0.004819	98.41
PC4	-0.076493	0.994438	-0.017028	-0.070375	0.000947	100
			2020
Eigenvectors	LST	NDBSI	NDVI	WET	Eigenvalue	Percentage
PC1	-0.836213	-0.258351	0.347492	0.336529	0.033917	63.86
PC2	-0.372054	0.043284	-0.924999	0.063875	0.012295	87.01
PC3	0.396239	-0.33822	-0.116813	0.845551	0.004748	95.95
PC4	-0.072927	0.903874	0.099908	0.409526	0.002151	100
