# Supplementary material for: Evaluation and driving factors of ecological environment quality in the Tarim River basin based on remote sensing ecological index
Source: PeerJ journal article supplement (doi:10.7717/peerj.18368), 2024-10-28
Supplement: Transition_matrix_data.xlsx [file Transition_matrix_data.xlsx]

## Sheet: Sheet2
	2005								2010
2000	poor	fair	moderate	good	excellent	total		2005	poor	fair	moderate	good	excellent	total
poor	465209	59513.2	60.7738	26.464	3.88378	524814		poor	467782	16123.3	17.8603	186.875	22.2768	484132
fair	18872.4	286408	68319.4	238.81	26.7381	373865		fair	35806.4	287692	48477.5	322.768	286.023	372584
moderate	21.5991	26339.3	84094.6	8042.91	248.402	118747		moderate	11.0454	14231	136906	6105.45	303.765	157557
good	32.5612	229.121	5035.35	13949.5	251.393	19497.9		good	47.752	414.341	8266.38	13536.1	1263.56	23528.1
excellent	3.19991	97.1351	46.5205	1268.13	157.143	1572.13		excellent	3.05251	41.9567	173.26	327.612	137.98	683.861
total	484139	372587	157557	23525.8	687.56	1.0385e+06		total	503650	318502	193841	20478.8	2013.6	1.03849e+06
	2015								2020
2010	poor	fair	moderate	good	excellent	total		2015	poor	fair	moderate	good	excellent	total
poor	455995	47586.9	39.3576	39.813	6.9542	503668		poor	434128	39901.1	614.009	170.467	1.67861	474816
fair	18625.7	239646	59544.2	555.353	189.09	318561		fair	30236.7	247594	35176.8	412.943	39.7515	313460
moderate	27.6217	25831.6	157960	9982.4	136.139	193937		moderate	378.077	85679.4	131081	7778.5	76.6907	224994
good	152.574	226.406	6959.19	12940.9	306.649	20585.7		good	36.0854	2888.95	8719.54	12561	446.411	24652
excellent	14.5926	170.787	490.653	1133.41	230.01	2039.46		excellent	7.74962	232.195	99.0651	393.333	138.812	871.154
total	474815	313462	224993	24651.9	868.843	1.03879e+06		total	464787	376295	175690	21316.2	703.343	1.03879e+06
